# Supplementary material for: Retrospective study of influencing factors on the outcomes of luteal phase stimulation in patients with dual stimulation
Source: PeerJ. 2023 May 5;11:e15296. doi: 10.7717/peerj.15296 (PMC10166075; doi:10.7717/peerj.15296)
Supplement: Supplemental Information 1 [file peerj-11-15296-s001.xlsx]

## Sheet: DS
								FPS	age	interval	FPS-Gnpriming dose	LPS-Gnpriming dose	FPS-Gndays	LPS-Gndays	FPS-Gntotal dose	LPS-Gntotal dose	FPS-Oocytes(N)	LPS-Oocytes(N)	FPS-available embryo (N)	LPS-available embryo (N)	FPS-high quality embryo (N)	LPS-high quality embryo (N)	outcome groups	FPS-available embryo (rate)	LPS-available embryo (rate)	FPS-high quality embryo (rate)	LPS-high quality embryo (rate)
	cases						short protocol	1	38	3	300	150	11	5	2400	750	1	0	0	0	0	0	1	0	0	0	0
short protocol	13							1	34	2	300	225	9	2	2175	450	1	1	1	0	0	0	2	1	0	0	0
long protocol	7							1	40	4	262.5	262.5	9	2	2437.5	487.5	1	0	0	0	0	0	1	0	0	0	0
antagonist protocol	34							1	44	8	300	225	13	6	4200	1800	0	1	0	1	0	1	4	0	1	0	1
PPOS protocol	30							1	33	2	300	150	8	2	2250	300	2	1	2	0	0	0	2	1	0	0	0
mild-stimulation protocol	10							1	33	3	300	150	7	2	1950	300	1	0	1	0	1	0	1	1	0	1	0
natural-cycle protocol	8							1	38	2	300	150	11	1	3150	150	2	3	0	0	0	0	2	0	0	0	0
								1	41	2	300	225	5	1	1350	225	1	1	0	0	0	0	2	0	0	0	0
								1	51	6	225	150	6	4	1350	650	1	0	1	0	1	0	1	1	0	1	0
age	short protocol	long protocol	antagonist protocol	PPOS protocol	mild-stimulation protocol	natural-cycle protocol	long protocol	2	44	6	300	150	13	5	3600	750	1	1	1	1	1	1	4	1	1	1	1
	38	44	43	40	45	36		2	29	3	150	150	17	1	4125	150	1	1	0	0	0	0	2	0	0	0	0
	34	29	31	36	31	30		2	28	1	225	150	11	1	2325	150	3	16	2	4	1	4	4	0.666667	0.25	0.333333	0.25
	45	28	31	39	32	36		2	41	1	275	150	10	1	2750	150	3	2	1	0	1	0	2	0.333333	0	0.333333	0
	40	41	32	39	29	33		2	37	1	200	150	12	1	2350	150	0	1	0	0	0	0	2	0	0	0	0
	44	34	26	36	39	44	antagonist protocol	3	43	8	225	225	4	6	862.5	1350	1	2	0	1	0	1	4	0	0.5	0	0.5
	33	37	23	46	42			3	31	7	225	225	4	6	825	1200	1	1	0	1	0	1	4	0	1	0	1
	37	28	40	39				3	31	12	262.5	225	6	10	1612.5	2287.5	0	0	0	0	0	0	1	0	0	0	0
	33		37	46				3	32	5	187.5	225	7	2	1387.5	375	10	1	1	0	1	0	2	0.1	0	0.1	0
	38		37	42				3	26	2	150	150	11	2	1950	300	1	0	1	0	0	0	1	1	0	0	0
	41		40	37				3	23	8	200	225	6	7	1162.5	1650	1	4	1	1	1	1	4	1	0.25	1	0.25
	37		40	44				3	40	13	225	225	5	12	975	2362.5	2	8	0	6	0	5	4	0	0.75	0	0.625
	33		31	40				3	37	9	150	225	2	4	187.5	825	1	1	0	1	0	1	4	0	1	0	1
	51		35	43				3	37	3	250	225	5	2	1200	450	1	5	0	2	0	1	4	0	0.4	0	0.2
			39	31				3	40	18	262.5	225	10	14	2587.5	3750	1	2	0	1	0	1	4	0	0.5	0	0.5
			40	40				3	40	15	225	225	6	13	1275	3300	1	3	1	1	1	1	4	1	0.333333	1	0.333333
			34	34				3	31	7	300	300	8	6	2250	1725	2	3	2	2	1	2	4	1	0.666667	0.5	0.666667
			40	43				3	35	14	262.5	225	6	13	1312.5	3600	3	9	1	6	1	4	4	0.333333	0.666667	0.333333	0.444444
			33	34				3	34	10	300	300	7	8	1875	2325	1	8	0	1	0	1	4	0	0.125	0	0.125
			42	46				3	33	4	225	300	15	2	3825	600	2	0	2	0	2	0	1	1	0	1	0
			25	40				3	42	8	150	150	3	6	450	1125	1	0	0	0	0	0	1	0	0	0	0
			32	42				3	32	1	225	150	9	1	2025	150	4	6	0	1	0	1	4	0	0.166667	0	0.166667
			38	31				3	38	16	225	225	8	13	1800	3375	1	2	1	2	0	2	4	1	1	0	1
			29	42				3	42	3	300	225	4	2	1125	450	0	0	0	0	0	0	1	0	0	0	0
			42	37				3	34	2	225	150	8	2	1912.5	300	4	0	1	0	0	0	1	0.25	0	0	0
			34	44				3	38	2	225	225	11	2	2662.5	450	1	0	1	0	1	0	1	1	0	1	0
			38	40				3	34	14	300	300	6	12	1350	4650	3	7	1	2	1	1	4	0.333333	0.285714	0.333333	0.142857
			46	36				3	45	3	300	150	6	2	1725	375	1	0	1	0	1	0	1	1	0	1	0
			47	47				3	32	1	200	150	6	1	1163	150	4	3	4	1	3	0	3	1	0.333333	0.75	0
			34	40				3	40	18	150	225	25	11	7050	2850	1	0	1	0	1	0	1	1	0	1	0
			45	50				3	36	8	225	225	6	5	1325	1200	1	0	0	0	0	0	1	0	0	0	0
			32				PPOS protocol	4	36	4	300	150	5	4	1350	600	1	0	1	0	0	0	1	1	0	0	0
			30					4	39	5	300	375	13	4	4650	1500	1	1	1	0	0	0	2	1	0	0	0
			40					4	39	4	300	300	4	3	1200	750	1	5	0	2	0	1	4	0	0.4	0	0.2
			36					4	36	8	300	300	8	7	2400	2100	1	2	1	1	1	0	3	1	0.5	1	0
								4	46	3	150	150	22	2	5025	300	3	0	2	0	1	0	1	0.666667	0	0.333333	0
								4	39	4	300	300	5	3	1200	900	3	1	1	0	1	0	2	0.333333	0	0.333333	0
GNpriming dose								4	46	6	225	225	9	13	1725	3075	1	0	1	0	1	0	1	1	0	1	0
Gndays								4	42	8	150	150	4	7	600	1275	0	1	0	0	0	0	2	0	0	0	0
Gntotal dose								4	37	3	150	225	6	3	900	675	1	0	0	0	0	0	1	0	0	0	0
								4	44	5	300	300	9	4	2475	1150	3	4	3	1	3	1	4	1	0.25	1	0.25
								4	40	5	300	300	7	4	1950	1200	2	2	1	1	1	1	4	0.5	0.5	0.5	0.5
								4	43	9	225	225	6	7	1050	1425	1	1	1	0	1	0	2	1	0	1	0
								4	31	9	225	225	7	7	1575	1687.5	1	4	0	2	0	1	4	0	0.5	0	0.25
								4	40	6	225	150	6	4	1162.5	600	1	1	1	1	1	1	4	1	1	1	1
								4	34	10	300	300	5	9	1500	3075	2	4	2	1	1	1	4	1	0.25	0.5	0.25
								4	43	7	300	375	16	6	5400	2250	1	1	1	1	1	1	4	1	1	1	1
								4	34	8	300	300	3	7	825	2325	1	2	0	2	0	2	4	0	1	0	1
								4	46	3	225	225	10	2	2550	450	2	3	0	1	0	0	3	0	0.333333	0	0
								4	40	5	225	225	7	4	1800	1125	1	3	0	1	0	1	4	0	0.333333	0	0.333333
								4	42	6	300	375	9	5	3375	1650	1	0	1	0	1	0	1	1	0	1	0
								4	42	14	300	300	11	13	3150	4200	1	3	1	2	1	2	4	1	0.666667	1	0.666667
								4	37	9	300	225	8	7	2325	1500	1	1	1	1	1	0	3	1	1	1	0
								4	40	2	225	300	11	2	2700	825	1	0	0	0	0	0	1	0	0	0	0
								4	36	4	262.5	225	9	3	2175	675	1	0	1	0	0	0	1	1	0	0	0
								4	47	11	300	300	4	9	1200	2700	2	3	0	2	0	0	3	0	0.666667	0	0
								4	40	2	225	187.5	8	3	1800	562.5	1	0	1	0	0	0	1	1	0	0	0
							mild-stimulation protocol	5	45	2	150	150	6	2	900	300	1	1	0	0	0	0	2	0	0	0	0
								5	31	9	150	225	3	8	450	1800	1	5	1	3	1	2	4	1	0.6	1	0.4
								5	32	8	75	225	1	6	75	1275	0	3	0	1	0	1	4	0	0.333333	0	0.333333
								5	29	14	150	225	3	12	450	2662.5	3	3	3	3	3	3	4	1	1	1	1
								5	39	16	150	150	6	2	900	300	3	1	0	0	0	0	2	0	0	0	0
								5	42	9	150	225	4	8	600	1650	1	3	1	2	1	2	4	1	0.666667	1	0.666667
								5	41	5	225	300	8	5	1725	1275	3	0	2	0	2	0	1	0.666667	0	0.666667	0
							natural-cycle protocol方案	6	36	8		225		7		1875	0	3	0	1	0	1	4	0	0.333333	0	0.333333
								6	30	12		225		10		2250	1	2	0	0	0	0	2	0	0	0	0
								6	36	13		300		12		3787.5	1	4	0	0	0	0	2	0	0	0	0
								6	33	13		225		12		3225	0	1	0	1	0	0	3	0	1	0	0
								6	44	9		300		7		2100	1	3	1	3	0	3	4	1	1	0	1
																		23		39		45	23
Correlation
		female age	interval	LPS-Gnpriming dose	LPS-Gndays	LPS-Gntotal dose	LPSOocytes(N)	LPS-available embryo (N)	LPS-high quality embryo (N)
female age	Pearson Correlation	1	-0.016	0.081	-0.008	-0.003	-.289*	-0.142	-0.158
	Sig.（2-tailed）		0.889	0.482	0.946	0.977	0.01	0.217	0.168
	N	78	78	78	78	78	78	78	78
interval	Pearson Correlation	-0.016	1	.280*	.882**	.842**	0.18	.386**	.363**
	Sig.（2-tailed）	0.889		0.013	0	0	0.114	0	0.001
	N	78	78	78	78	78	78	78	78
LPS-Gnpriming dose	Pearson Correlation	0.081	.280*	1	.329**	.503**	0.09	0.168	0.141
	Sig.（2-tailed）	0.482	0.013		0.003	0	0.432	0.142	0.219
	N	78	78	78	78	78	78	78	78
LPS-Gndays	Pearson Correlation	-0.008	.882**	.329**	1	.952**	.224*	.445**	.415**
	Sig.（2-tailed）	0.946	0	0.003		0	0.048	0	0
	N	78	78	78	78	78	78	78	78
LPS-Gntotal dose	Pearson Correlation	-0.003	.842**	.503**	.952**	1	.264*	.421**	.379**
	Sig.（2-tailed）	0.977	0	0	0		0.02	0	0.001
	N	78	78	78	78	78	78	78	78
LPSOocytes(N)	Pearson Correlation	-.289*	0.18	0.09	.224*	.264*	1	.758**	.724**
	Sig.（2-tailed）	0.01	0.114	0.432	0.048	0.02		0	0
	N	78	78	78	78	78	78	78	78
LPS-available embryo (N)	Pearson Correlation	-0.142	.386**	0.168	.445**	.421**	.758**	1	.934**
	Sig.（2-tailed）	0.217	0	0.142	0	0	0		0
	N	78	78	78	78	78	78	78	78
LPS-high quality embryo (N)	Pearson Correlation	-0.158	.363**	0.141	.415**	.379**	.724**	.934**	1
	Sig.（2-tailed）	0.168	0.001	0.219	0	0.001	0	0
	N	78	78	78	78	78	78	78	78
* Correlation is significant at the 0.05 level (2-tailed).
** Correlation is significant at the 0.01 level (2-tailed).
Correlation
		female age	interval	LPS-Gnpriming dose	LPS-Gndays	LPS-Gntotal dose	LPSOocytes(N)	LPS-available embryo (N)	LPS-high quality embryo (N)	LPS-available embryo (rate)	LPS-high quality embryo (rate)
female age	Pearson Correlation	1	-0.016	0.081	-0.008	-0.003	-.289*	-0.142	-0.158	0	0.017
	Sig.（2-tailed）		0.889	0.482	0.946	0.977	0.01	0.217	0.168	0.998	0.883
	N	78	78	78	78	78	78	78	78	78	78
interval	Pearson Correlation	-0.016	1	.280*	.882**	.842**	0.18	.386**	.363**	.424**	.355**
	Sig.（2-tailed）	0.889		0.013	0	0	0.114	0	0.001	0	0.001
	N	78	78	78	78	78	78	78	78	78	78
LPS-Gnpriming dose	Pearson Correlation	0.081	.280*	1	.329**	.503**	0.09	0.168	0.141	.225*	0.189
	Sig.（2-tailed）	0.482	0.013		0.003	0	0.432	0.142	0.219	0.047	0.098
	N	78	78	78	78	78	78	78	78	78	78
LPS-Gndays	Pearson Correlation	-0.008	.882**	.329**	1	.952**	.224*	.445**	.415**	.432**	.348**
	Sig.（2-tailed）	0.946	0	0.003		0	0.048	0	0	0	0.002
	N	78	78	78	78	78	78	78	78	78	78
LPS-Gntotal dose	Pearson Correlation	-0.003	.842**	.503**	.952**	1	.264*	.421**	.379**	.412**	.327**
	Sig.（2-tailed）	0.977	0	0	0		0.02	0	0.001	0	0.004
	N	78	78	78	78	78	78	78	78	78	78
LPSOocytes(N)	Pearson Correlation	-.289*	0.18	0.09	.224*	.264*	1	.758**	.724**	.247*	0.204
	Sig.（2-tailed）	0.01	0.114	0.432	0.048	0.02		0	0	0.029	0.074
	N	78	78	78	78	78	78	78	78	78	78
LPS-available embryo (N)	Pearson Correlation	-0.142	.386**	0.168	.445**	.421**	.758**	1	.934**	.628**	.540**
	Sig.（2-tailed）	0.217	0	0.142	0	0	0		0	0	0
	N	78	78	78	78	78	78	78	78	78	78
LPS-high quality embryo (N)	Pearson Correlation	-0.158	.363**	0.141	.415**	.379**	.724**	.934**	1	.602**	.668**
	Sig.（2-tailed）	0.168	0.001	0.219	0	0.001	0	0		0	0
	N	78	78	78	78	78	78	78	78	78	78
LPS-available embryo (rate)	Pearson Correlation	0	.424**	.225*	.432**	.412**	.247*	.628**	.602**	1	.860**
	Sig.（2-tailed）	0.998	0	0.047	0	0	0.029	0	0		0
	N	78	78	78	78	78	78	78	78	78	78
LPS-high quality embryo (rate)	Pearson Correlation	0.017	.355**	0.189	.348**	.327**	0.204	.540**	.668**	.860**	1
	Sig.（2-tailed）	0.883	0.001	0.098	0.002	0.004	0.074	0	0	0
	N	78	78	78	78	78	78	78	78	78	78
* Correlation is significant at the 0.05 level (2-tailed).
** Correlation is significant at the 0.01 level (2-tailed).
Correlations
		female age	interval	LPS-Gnpriming dose	LPS-Gndays	LPS-Gntotal dose	LPSOocytes(N)	LPS-available embryo (N)	LPS-high quality embryo (N)	LPS-available embryo (rate)	LPS-high quality embryo (rate)
age	Pearson Correlation	1	-0.016	0.081	-0.008	-0.003	-.289*	-0.142	-0.158	0	0.017
	Sig. (2-tailed)		0.889	0.482	0.946	0.977	0.01	0.217	0.168	0.998	0.883
	N	78	78	78	78	78	78	78	78	78	78
interval	Pearson Correlation	-0.016	1	.280*	.882**	.842**	0.18	.386**	.363**	.424**	.355**
	Sig. (2-tailed)	0.889		0.013	0	0	0.114	0	0.001	0	0.001
	N	78	78	78	78	78	78	78	78	78	78
LPS-Gn priming dose	Pearson Correlation	0.081	.280*	1	.329**	.503**	0.09	0.168	0.141	.225*	0.189
	Sig. (2-tailed)	0.482	0.013		0.003	0	0.432	0.142	0.219	0.047	0.098
	N	78	78	78	78	78	78	78	78	78	78
LPS-Gn days	Pearson Correlation	-0.008	.882**	.329**	1	.952**	.224*	.445**	.415**	.432**	.348**
	Sig. (2-tailed)	0.946	0	0.003		0	0.048	0	0	0	0.002
	N	78	78	78	78	78	78	78	78	78	78
LPS-Gn total dose	Pearson Correlation	-0.003	.842**	.503**	.952**	1	.264*	.421**	.379**	.412**	.327**
	Sig. (2-tailed)	0.977	0	0	0		0.02	0	0.001	0	0.004
	N	78	78	78	78	78	78	78	78	78	78
LPS oocytes	Pearson Correlation	-.289*	0.18	0.09	.224*	.264*	1	.758**	.724**	.247*	0.204
	Sig. (2-tailed)	0.01	0.114	0.432	0.048	0.02		0	0	0.029	0.074
	N	78	78	78	78	78	78	78	78	78	78
LPS-available embryo (N)	Pearson Correlation	-0.142	.386**	0.168	.445**	.421**	.758**	1	.934**	.628**	.540**
	Sig. (2-tailed)	0.217	0	0.142	0	0	0		0	0	0
	N	78	78	78	78	78	78	78	78	78	78
LPS-high quality embryo (N)	Pearson Correlation	-0.158	.363**	0.141	.415**	.379**	.724**	.934**	1	.602**	.668**
	Sig. (2-tailed)	0.168	0.001	0.219	0	0.001	0	0		0	0
	N	78	78	78	78	78	78	78	78	78	78
LPS-available embryo (rate)	Pearson Correlation	0	.424**	.225*	.432**	.412**	.247*	.628**	.602**	1	.860**
	Sig. (2-tailed)	0.998	0	0.047	0	0	0.029	0	0		0
	N	78	78	78	78	78	78	78	78	78	78
LPS-high quality embryo (rate)	Pearson Correlation	0.017	.355**	0.189	.348**	.327**	0.204	.540**	.668**	.860**	1
	Sig. (2-tailed)	0.883	0.001	0.098	0.002	0.004	0.074	0	0	0
	N	78	78	78	78	78	78	78	78	78	78
* Correlation is significant at the 0.05 level (2-tailed).
** Correlation is significant at the 0.01 level (2-tailed).
table V
Correlations
		age	interval	LPS-Gn priming dose	LPS-Gn days	LPS-Gn total dose	LPS oocytes	LPSavailable embryo (N)	LPS-high quality embryo (N)	LPS-available embryo (rate)	LPS-high quality embryo (rate)
age	Pearson Correlation	1	-0.016	0.081	-0.008	-0.003	-.289*	-0.142	-0.158	0	0.017
	Sig. (2-tailed)		0.889	0.482	0.946	0.977	0.01	0.217	0.168	0.998	0.883
	N	78	78	78	78	78	78	78	78	78	78
interval	Pearson Correlation	-0.016	1	.280*	.882**	.842**	0.18	.386**	.363**	.424**	.355**
	Sig. (2-tailed)	0.889		0.013	0	0	0.114	0	0.001	0	0.001
	N	78	78	78	78	78	78	78	78	78	78
LPS-Gn priming dose	Pearson Correlation	0.081	.280*	1	.329**	.503**	0.09	0.168	0.141	.225*	0.189
	Sig. (2-tailed)	0.482	0.013		0.003	0	0.432	0.142	0.219	0.047	0.098
	N	78	78	78	78	78	78	78	78	78	78
LPS-Gn days	Pearson Correlation	-0.008	.882**	.329**	1	.952**	.224*	.445**	.415**	.432**	.348**
	Sig. (2-tailed)	0.946	0	0.003		0	0.048	0	0	0	0.002
	N	78	78	78	78	78	78	78	78	78	78
LPS-Gn total dose	Pearson Correlation	-0.003	.842**	.503**	.952**	1	.264*	.421**	.379**	.412**	.327**
	Sig. (2-tailed)	0.977	0	0	0		0.02	0	0.001	0	0.004
	N	78	78	78	78	78	78	78	78	78	78
* Correlation is significant at the 0.05 level (2-tailed).
** Correlation is significant at the 0.01 level (2-tailed).
	Multiple linear regression - no dumb variables
Coefficientsa
		Unstandardized Coefficients		Standardized Coefficients			Collinearity Statistics
Model		B	Std. Error	Beta	t	Sig.	Tolerance	VIF
1	(Constant)	0.072	0.224		0.323	0.748
	LPS-Gn days	0.145	0.033	0.445	4.328	0	1	1
a Dependent Variable: LPS-available embryos
Coefficientsa
		Unstandardized Coefficients		Standardized Coefficients			Collinearity Statistics
Model		B	Std. Error	Beta	t	Sig.	Tolerance	VIF
1	(Constant)	0.048	0.193		0.25	0.803
	LPS-Gn days	0.114	0.029	0.415	3.977	0	1	1
a Dependent Variable: LPS-high-quality embryos
Coefficientsa
		Unstandardized Coefficients		Standardized Coefficients			Collinearity Statistics
Model		B	Std. Error	Beta	t	Sig.	Tolerance	VIF
1	(Constant)	7.392	2.031		3.639	0
	age	-0.141	0.053	-0.289	-2.63	0.01	1	1
2	(Constant)	6.525	1.997		3.267	0.002
	age	-0.14	0.052	-0.288	-2.709	0.008
	LPS-Gn total dose	0.001	0	0.263	2.475	0.016
a Dependent Variable: LPS-oocytes
Model Summaryc
Model	R	R Square	Adjusted R Square	Std. Error of the Estimate	Change Statistics					Durbin-Watson
					R Square Change	F Change	df1	df2	Sig. F Change
1	.289a	0.083	0.071	2.526	0.083	6.917	1	76	0.01
2	.391b	0.153	0.13	2.445	0.069	6.126	1	75	0.016	2
a Predictors: (Constant), female age
b Predictors: (Constant), female age, LPS-Gntotal dose
c Dependent Variable: LPSOocytes(N)
ANOVAa
Model		Sum of Squares	df	Mean Square	F	Sig.
1	Regression	44.143	1	44.143	6.917	.010b
	Residual	485.036	76	6.382
	Total	529.179	77
2	Regression	80.768	2	40.384	6.754	.002c
	Residual	448.412	75	5.979
	Total	529.179	77
a Dependent Variable: LPSOocytes(N)
b Predictors: (Constant), female age
c Predictors: (Constant), female age, LPS-Gntotal dose
Coefficientsa
Model		Unstandardized Coefficients		Standardized Coefficients	t	Sig.	95.0% Confidence Interval for B		Collinearity Statistics
		B	Std. Error	Beta			Lower Bound	Upper Bound	Tolerance	VIF
1	(Constant)	7.392	2.031		3.639	0	3.346	11.438
	female age	-0.141	0.053	-0.289	-2.63	0.01	-0.247	-0.034	1	1
2	(Constant)	6.525	1.997		3.267	0.002	2.546	10.503
	female age	-0.14	0.052	-0.288	-2.709	0.008	-0.243	-0.037	1	1
	LPS-Gntotal dose	0.001	0	0.263	2.475	0.016	0	0.001	1	1
a Dependent Variable: LPSOocytes(N)
Model Summaryb
Model	R	R Square	Adjusted R Square	Std. Error of the Estimate	Change Statistics					Durbin-Watson
					R Square Change	F Change	df1	df2	Sig. F Change
1	.445a	0.198	0.187	1.119	0.198	18.733	1	76	0	1.823
a Predictors: (Constant), LPS-Gndays
b Dependent Variable: LPS-available embryo (N)
ANOVAa
Model		Sum of Squares	df	Mean Square	F	Sig.
1	Regression	23.476	1	23.476	18.733	.000b
	Residual	95.242	76	1.253
	Total	118.718	77
a Dependent Variable: LPS-available embryo (N)
b Predictors: (Constant), LPS-Gndays
Coefficientsa
Model		Unstandardized Coefficients		Standardized Coefficients	t	Sig.	95.0% Confidence Interval for B		Collinearity Statistics
		B	Std. Error	Beta			Lower Bound	Upper Bound	Tolerance	VIF
1	(Constant)	0.072	0.224		0.323	0.748	-0.374	0.518
	LPS-Gndays	0.145	0.033	0.445	4.328	0	0.078	0.211	1	1
a Dependent Variable: LPS-available embryo (N)
Model Summaryb
Model	R	R Square	Adjusted R Square	Std. Error of the Estimate	Change Statistics					Durbin-Watson
					R Square Change	F Change	df1	df2	Sig. F Change
1	.415a	0.172	0.161	0.962	0.172	15.819	1	76	0	1.738
a Predictors: (Constant), LPS-Gndays
b Dependent Variable: LPS-high quality embryo (N)
ANOVAa
Model		Sum of Squares	df	Mean Square	F	Sig.
1	Regression	14.642	1	14.642	15.819	.000b
	Residual	70.345	76	0.926
	Total	84.987	77
a Dependent Variable: LPS-high quality embryo (N)
b Predictors: (Constant), LPS-Gndays
Coefficientsa
Model		Unstandardized Coefficients		Standardized Coefficients	t	Sig.	95.0% Confidence Interval for B		Collinearity Statistics
		B	Std. Error	Beta			Lower Bound	Upper Bound	Tolerance	VIF
1	(Constant)	0.048	0.193		0.25	0.803	-0.335	0.432
	LPS-Gndays	0.114	0.029	0.415	3.977	0	0.057	0.171	1	1
a Dependent Variable: LPS-high quality embryo (N)
table VI		model			Coefficients
					Unstandardized Coefficients		Standardized Coefficients			95.0% Confidence Interval for B		Collinearity Statistics
Model		Adjusted R Square	F	Sig.	B	Std. Error	Beta	t	Sig.	Lower Bound	Upper Bound	Tolerance	VIF
oocytes	(Constant)	0.13	6.754	0.002	6.525	1.997		3.267	0.002	2.546	10.503
	Female age (age)				-0.14	0.052	-0.288	-2.709	0.008	-0.243	-0.037	1	1
	LPS-Gn dose (Gn)				0.001	0	0.263	2.475	0.016	0	0.001	1	1
available embryos	(Constant)	0.187	18.773	0	0.072	0.224		0.323	0.748	-0.374	0.518
(LPS-AE)	LPS-Gn days (GnD)				0.145	0.033	0.445	4.328	0	0.078	0.211	1	1
high-quality embryos (LPS-HQE)	(Constant)	0.161	15.819	0	0.048	0.193		0.25	0.803	-0.335	0.432
	LPS-Gn days (GnD)				0.114	0.029	0.415	3.977	0	0.057	0.171	1	1
compare Oocytes(N)、available embryo (N)、high quality embryo (N)、available embryo (rate) 、high quality embryo (rate) between FPS and LPS
The data were non-normally distributed using the Mann-Whitney U test
Ranks														Mean Rank
	protocols	N	Rank average	The sum of ranks		Test statistics a								FPS	LPS	Z	P
Oocytes(N)	1	78	76.9	5998.5			Oocytes(N)	available embryo (N)	high quality embryo (N)	available embryo (rate)	high quality embryo (rate)		oocytes	76.9	80.1	-0.463	0.643
	2	78	80.1	6247.5		Mann-Whitney U	2917.5	3040.5	2942.5	2503.5	2829.5		available embryo (N)	78.48	78.52	-0.006	0.995
	total	156				Wilcoxon W	5998.5	6121.5	6023.5	5584.5	5910.5		high quality embryo (N)	77.22	79.78	-0.401	0.689
available embryo (N)	1	78	78.48	6121.5		Z	-0.463	-0.006	-0.401	-2.048	-0.842		available embryo (rate,%)	85.4	71.6	-2.048	0.041
	2	78	78.52	6124.5		Asymptotic prominence（2-tailed）	0.643	0.995	0.689	0.041	0.4		high quality embryo (rate,%)	81.22	75.78	-0.842	0.4
	total	156				a Grouping variables：protocols
high quality embryo (N)	1	78	77.22	6023.5
	2	78	79.78	6222.5
	total	156
available embryo (rate)	1	78	85.4	6661.5
	2	78	71.6	5584.5
	total	156
high quality embryo (rate)	1	78	81.22	6335.5
	2	78	75.78	5910.5
	total	156
DS cases distribution
	2017	2018	2019	2020	2021	2022	COR	DS	total
short protocol	1	0	2	0	5	5	4	9	13
long protocol	0	2	1	0	3	1	2	5	14
antagonist protocol	1	2	6	8	12	5	8	26	68
PPOS protocol	0	9	4	6	10	1	3	27	60
mild-stimulation protocol	0	2	3	0	2	0	0	7	14
natural-cycle protocol方案	0	1	1	0	2	1	0	5	5
total	2	16	17	14	34	13	17	79
table 1
Double-cycle distribution from 2017 to 2022
	2017	2018	2019	2020	2021	2022	COR	DS	total
short protocol	1	0	2	0	5	5	4	9	13
long protocol	0	2	1	0	3	1	2	5	7
antagonist protocol	1	2	6	8	12	5	8	26	34
PPOS protocol	0	9	4	6	10	1	3	26	30
micro stimulation protocol	0	2	3	0	2	0	0	7	7
natural cycle protocol	0	1	1	0	2	1	0	5	5
total	2	16	17	14	34	13	17	78	96
LPS outcomes of DS
	cases	OPU		available embryo		high-quality embryo
		(cases)	(oocytes)	(cases)	(embryos)	(cases)	(embryos)
short protocol	9	5	7	1	1	1	1	0.555556	0.2	0.142857	0.2	0.142857
long protocol	5	5	21	2	5	2	5	1	0.4	0.238095	0.4	0.238095
antagonist protocol	26	16	65	15	29	14	23	0.615385	0.9375	0.446154	0.875	0.353846
PPOS protocol	26	18	42	14	19	10	12	0.692308	0.777778	0.452381	0.555556	0.285714
micro stimulation protocol	7	6	16	4	9	4	8	0.857143	0.666667	0.5625	0.666667	0.5
natural cycle protocol	5	5	13	3	5	2	4	1	0.6	0.384615	0.4	0.307692
total	78	55	164	39	68	33	53	0.705128	0.709091	0.414634	0.6	0.323171
LPS outcomes of DS
	cases	OPU		available embryo		high-quality embryo
		(cases)	(oocytes)	(cases)	(embryos)	(cases)	(embryos)
short protocol	9	5 (56%)	7	1 (20%)	1 (14%)	1 (20%)	1 (14%)
long protocol	5	5 (100%)	21	2 (40%)	5 (24%)	2 (40%)	5 (24%)
antagonist protocol	26	16 (62%)	65	15 (94%)	29 (45%)	14 (88%)	23 (35%)
PPOS protocol	26	18 (69%)	42	14 (78%)	19 (45%)	10 (56%)	12 (29%)
micro stimulation protocol	7	6 (86%)	16	4 (67%)	9 (56%)	4 (67%)	8 (50%)
natural cycle protocol	5	5 (100%)	13	3 (60%)	5 (38%)	2 (40%)	4 (31%)
total	78	55 (71%)	164	39 (71%)	68 (41%)	33 (60%)	53 (32%)
Test Statisticsa
	oocytes retrieved	available embryos (N)	high-qulity embryos (N)	available embryos (rate)	high-qulity embryos (rate)
Mann-Whitney U	2917.5	3040.5	2942.5	2503.5	2829.5
Wilcoxon W	5998.5	6121.5	6023.5	5584.5	5910.5
Z	-0.463	-0.006	-0.401	-2.048	-0.842
Asymp. Sig. (2-tailed)	0.643	0.995	0.689	0.041	0.4
a Grouping Variable: FPS/LPS
Ranks
		N	Mean Rank	Sum of Ranks
oocytes retrieved	FPS	78	76.9	5998.5
	LPS	78	80.1	6247.5
	Total	156
available embryos (N)	FPS	78	78.48	6121.5
	LPS	78	78.52	6124.5
	Total	156
high-qulity embryos (N)	FPS	78	77.22	6023.5
	LPS	78	79.78	6222.5
	Total	156
available embryos (rate)	FPS	78	85.4	6661.5
	LPS	78	71.6	5584.5
	Total	156
high-qulity embryos (rate)	FPS	78	81.22	6335.5
	LPS	78	75.78	5910.5
	Total	156
Oocytes(N)	Programme 3
Model Summaryd
Model	R	R Square	Adjusted R Square	Std. Error of the Estimate	Change Statistics					Durbin-Watson
					R Square Change	F Change	df1	df2	Sig. F Change
1	.289a	0.083	0.071	2.526	0.083	6.917	1	76	0.01
2	.391b	0.153	0.13	2.445	0.069	6.126	1	75	0.016
3	.480c	0.23	0.153	2.412	0.078	1.414	5	70	0.23	2.252
a Predictors: (Constant), female age
b Predictors: (Constant), female age, LPS-Gntotal dose
c Predictors: (Constant), female age, LPS-Gntotal dose, protocol=5.0, protocol=2.0, protocol=6.0, protocol=1.0, protocol=3.0
d Dependent Variable: LPSOocytes(N)
ANOVAa
Model		Sum of Squares	df	Mean Square	F	Sig.
1	Regression	44.143	1	44.143	6.917	.010b
	Residual	485.036	76	6.382
	Total	529.179	77
2	Regression	80.768	2	40.384	6.754	.002c
	Residual	448.412	75	5.979
	Total	529.179	77
3	Regression	121.914	7	17.416	2.993	.008d
	Residual	407.266	70	5.818
	Total	529.179	77
a Dependent Variable: LPSOocytes(N)
b Predictors: (Constant), female age
c Predictors: (Constant), female age, LPS-Gntotal dose
d Predictors: (Constant), female age, LPS-Gntotal dose, protocol=5.0, protocol=2.0, protocol=6.0, protocol=1.0, protocol=3.0
Coefficientsa
Model		Unstandardized Coefficients		Standardized Coefficients	t	Sig.	95.0% Confidence Interval for B		Collinearity Statistics
		B	Std. Error	Beta			Lower Bound	Upper Bound	Tolerance	VIF
1	(Constant)	7.392	2.031		3.639	0	3.346	11.438
	female age	-0.141	0.053	-0.289	-2.63	0.01	-0.247	-0.034	1	1
2	(Constant)	6.525	1.997		3.267	0.002	2.546	10.503
	female age	-0.14	0.052	-0.288	-2.709	0.008	-0.243	-0.037	1	1
	LPS-Gntotal dose	0.001	0	0.263	2.475	0.016	0	0.001	1	1
3	(Constant)	5.278	2.268		2.327	0.023	0.755	9.802
	female age	-0.121	0.055	-0.248	-2.197	0.031	-0.23	-0.011	0.863	1.159
	LPS-Gntotal dose	0.001	0	0.337	2.842	0.006	0	0.001	0.78	1.282
	protocol=1.0	-0.223	0.967	-0.027	-0.23	0.818	-2.152	1.706	0.781	1.28
	protocol=2.0	3.033	1.243	0.285	2.44	0.017	0.553	5.513	0.804	1.243
	protocol=3.0	0.281	0.711	0.051	0.396	0.694	-1.137	1.7	0.664	1.507
	protocol=5.0	0.438	1.041	0.048	0.421	0.675	-1.637	2.514	0.843	1.186
	protocol=6.0	-0.43	1.244	-0.04	-0.345	0.731	-2.912	2.052	0.803	1.245			Regression analysis of LPS outcomes included in the FPS regimen showed that Oocytes(N) had a clear protective effect relative to the antagonist regimen, long protocol and LPS-Gntotal dose, and female age as a risk factor
a Dependent Variable: LPSOocytes(N)
available embryo (N)回归	Programme 2
Model Summaryc
Model	R	R Square	Adjusted R Square	Std. Error of the Estimate	Change Statistics					Durbin-Watson
					R Square Change	F Change	df1	df2	Sig. F Change
1	.445a	0.198	0.187	1.119	0.198	18.733	1	76	0
2	.500b	0.25	0.187	1.12	0.052	0.987	5	71	0.432	1.969
a Predictors: (Constant), LPS-Gndays
b Predictors: (Constant), LPS-Gndays, protocol=4.0, protocol=5.0, protocol=2.0, protocol=6.0, protocol=1.0
c Dependent Variable: LPS-available embryo (N)
ANOVAa
Model		Sum of Squares	df	Mean Square	F	Sig.
1	Regression	23.476	1	23.476	18.733	.000b
	Residual	95.242	76	1.253
	Total	118.718	77
2	Regression	29.667	6	4.945	3.942	.002c
	Residual	89.051	71	1.254
	Total	118.718	77
a Dependent Variable: LPS-available embryo (N)
b Predictors: (Constant), LPS-Gndays													Regression analysis of LPS outcomes included in FPS regimens showed that the effect of LPS-Gndays was the only protective factor compared to the antagonist regimen, and the effect of FPS regimen selection was not clear compared to the antagonist regimen
c Predictors: (Constant), LPS-Gndays, protocol=4.0, protocol=5.0, protocol=2.0, protocol=6.0, protocol=1.0
Coefficientsa
Model		Unstandardized Coefficients		Standardized Coefficients	t	Sig.	95.0% Confidence Interval for B		Collinearity Statistics
		B	Std. Error	Beta			Lower Bound	Upper Bound	Tolerance	VIF
1	(Constant)	0.072	0.224		0.323	0.748	-0.374	0.518
	LPS-Gndays	0.145	0.033	0.445	4.328	0	0.078	0.211	1	1
2	(Constant)	0.141	0.324		0.437	0.663	-0.504	0.787
	LPS-Gndays	0.154	0.038	0.475	4.095	0	0.079	0.23	0.787	1.271
	protocol=1.0	-0.459	0.453	-0.119	-1.014	0.314	-1.363	0.444	0.767	1.303
	protocol=2.0	0.581	0.573	0.115	1.014	0.314	-0.561	1.723	0.817	1.224
	protocol=4.0	-0.254	0.312	-0.097	-0.813	0.419	-0.877	0.369	0.742	1.347
	protocol=5.0	0.196	0.477	0.045	0.411	0.683	-0.755	1.147	0.865	1.156
	protocol=6.0	-0.624	0.561	-0.124	-1.112	0.27	-1.742	0.494	0.852	1.173
a Dependent Variable: LPS-available embryo (N)
high quality embryo (N)回归	Programme 2
Model Summaryc
Model	R	R Square	Adjusted R Square	Std. Error of the Estimate	Change Statistics					Durbin-Watson
					R Square Change	F Change	df1	df2	Sig. F Change
1	.415a	0.172	0.161	0.962	0.172	15.819	1	76	0
2	.501b	0.251	0.187	0.947	0.078	1.486	5	71	0.205	1.956
a Predictors: (Constant), LPS-Gndays
b Predictors: (Constant), LPS-Gndays, protocol=4.0, protocol=5.0, protocol=2.0, protocol=6.0, protocol=1.0
c Dependent Variable: LPS-high quality embryo (N)
ANOVAa
Model		Sum of Squares	df	Mean Square	F	Sig.
1	Regression	14.642	1	14.642	15.819	.000b
	Residual	70.345	76	0.926
	Total	84.987	77
2	Regression	21.305	6	3.551	3.959	.002c
	Residual	63.682	71	0.897
	Total	84.987	77
a Dependent Variable: LPS-high quality embryo (N)
b Predictors: (Constant), LPS-Gndays
c Predictors: (Constant), LPS-Gndays, protocol=4.0, protocol=5.0, protocol=2.0, protocol=6.0, protocol=1.0
Coefficientsa
Model		Unstandardized Coefficients		Standardized Coefficients	t	Sig.	95.0% Confidence Interval for B		Collinearity Statistics
		B	Std. Error	Beta			Lower Bound	Upper Bound	Tolerance	VIF
1	(Constant)	0.048	0.193		0.25	0.803	-0.335	0.432
	LPS-Gndays	0.114	0.029	0.415	3.977	0	0.057	0.171	1	1
2	(Constant)	0.091	0.274		0.331	0.741	-0.455	0.637
	LPS-Gndays	0.126	0.032	0.457	3.948	0	0.062	0.189	0.787	1.271
	protocol=1.0	-0.329	0.383	-0.101	-0.859	0.393	-1.093	0.435	0.767	1.303
	protocol=2.0	0.683	0.484	0.16	1.41	0.163	-0.283	1.648	0.817	1.224
	protocol=4.0	-0.317	0.264	-0.143	-1.199	0.235	-0.843	0.21	0.742	1.347
	protocol=5.0	0.279	0.403	0.076	0.692	0.491	-0.525	1.083	0.865	1.156
	protocol=6.0	-0.499	0.474	-0.117	-1.052	0.296	-1.445	0.447	0.852	1.173
a Dependent Variable: LPS-high quality embryo (N)
available embryo (rate) 回归	Programme 2
Model Summaryc
Model	R	R Square	Adjusted R Square	Std. Error of the Estimate	Change Statistics					Durbin-Watson
					R Square Change	F Change	df1	df2	Sig. F Change
1	.432a	0.187	0.176	0.33755	0.187	17.45	1	76	0
2	.449b	0.201	0.134	0.34611	0.014	0.258	5	71	0.935	1.795
a Predictors: (Constant), LPS-Gndays
b Predictors: (Constant), LPS-Gndays, protocol=4.0, protocol=5.0, protocol=2.0, protocol=6.0, protocol=1.0
c Dependent Variable: LPS-available embryo (rate)
ANOVAa
Model		Sum of Squares	df	Mean Square	F	Sig.
1	Regression	1.988	1	1.988	17.45	.000b
	Residual	8.66	76	0.114
	Total	10.648	77
2	Regression	2.143	6	0.357	2.981	.012c
	Residual	8.505	71	0.12
	Total	10.648	77
a Dependent Variable: LPS-available embryo (rate)
b Predictors: (Constant), LPS-Gndays
c Predictors: (Constant), LPS-Gndays, protocol=4.0, protocol=5.0, protocol=2.0, protocol=6.0, protocol=1.0
Coefficientsa
Model		Unstandardized Coefficients		Standardized Coefficients	t	Sig.	95.0% Confidence Interval for B		Collinearity Statistics
		B	Std. Error	Beta			Lower Bound	Upper Bound	Tolerance	VIF
1	(Constant)	0.07	0.068		1.029	0.307	-0.065	0.204
	LPS-Gndays	0.042	0.01	0.432	4.177	0	0.022	0.062	1	1
2	(Constant)	0.037	0.1		0.37	0.713	-0.163	0.236
	LPS-Gndays	0.043	0.012	0.44	3.678	0	0.02	0.066	0.787	1.271
	protocol=1.0	-0.045	0.14	-0.039	-0.321	0.749	-0.324	0.234	0.767	1.303
	protocol=2.0	0.136	0.177	0.09	0.768	0.445	-0.217	0.489	0.817	1.224
	protocol=4.0	0.052	0.096	0.066	0.539	0.591	-0.14	0.244	0.742	1.347
	protocol=5.0	0.071	0.147	0.055	0.483	0.631	-0.223	0.365	0.865	1.156
	protocol=6.0	0.018	0.173	0.012	0.102	0.919	-0.328	0.363	0.852	1.173
a Dependent Variable: LPS-available embryo (rate)
high quality embryo (rate) 回归	Programme 2
Model Summaryc
Model	R	R Square	Adjusted R Square	Std. Error of the Estimate	Change Statistics					Durbin-Watson
					R Square Change	F Change	df1	df2	Sig. F Change
1	.355a	0.126	0.115	0.32887	0.126	10.959	1	76	0.001
2	.379b	0.144	0.071	0.33681	0.018	0.292	5	71	0.916	1.982
a Predictors: (Constant), interval
b Predictors: (Constant), interval, protocol=4.0, protocol=5.0, protocol=6.0, protocol=2.0, protocol=1.0
c Dependent Variable: LPS-high quality embryo (rate)
ANOVAa
Model		Sum of Squares	df	Mean Square	F	Sig.
1	Regression	1.185	1	1.185	10.959	.001b
	Residual	8.22	76	0.108
	Total	9.405	77
2	Regression	1.351	6	0.225	1.985	.079c
	Residual	8.054	71	0.113
	Total	9.405	77
a Dependent Variable: LPS-high quality embryo (rate)
b Predictors: (Constant), interval
c Predictors: (Constant), interval, protocol=4.0, protocol=5.0, protocol=6.0, protocol=2.0, protocol=1.0
Coefficientsa
Model		Unstandardized Coefficients		Standardized Coefficients	t	Sig.	95.0% Confidence Interval for B		Collinearity Statistics
		B	Std. Error	Beta			Lower Bound	Upper Bound	Tolerance	VIF
1	(Constant)	0.047	0.068		0.686	0.495	-0.089	0.183
	interval	0.028	0.008	0.355	3.31	0.001	0.011	0.044	1	1
2	(Constant)	0.022	0.103		0.213	0.832	-0.184	0.228
	interval	0.03	0.01	0.388	3.087	0.003	0.011	0.05	0.762	1.313
	protocol=1.0	-0.019	0.138	-0.017	-0.135	0.893	-0.293	0.256	0.751	1.331
	protocol=2.0	0.155	0.174	0.11	0.894	0.374	-0.191	0.502	0.803	1.245
	protocol=4.0	0.001	0.095	0.002	0.014	0.989	-0.189	0.191	0.719	1.39
	protocol=5.0	0.048	0.144	0.04	0.337	0.737	-0.238	0.335	0.862	1.16
	protocol=6.0	-0.089	0.167	-0.063	-0.533	0.595	-0.422	0.244	0.87	1.149
a Dependent Variable: LPS-high quality embryo (rate)
table VI
		model			Coefficients
					Unstandardized Coefficients		Standardized Coefficients			95.0% Confidence Interval for B		Collinearity Statistics
Model		Adjusted R Square	F	Sig.	B	Std. Error	Beta	t	Sig.	Lower Bound	Upper Bound	Tolerance	VIF
oocytes	(Constant)	0.153	2.993	0.008	5.278	2.268		2.327	0.023	0.755	9.802
	female age				-0.121	0.055	-0.248	-2.197	0.031	-0.23	-0.011	0.863	1.159
	LPS-Gntotal dose				0.001	0	0.337	2.842	0.006	0	0.001	0.78	1.282
	protocol=1.0				-0.223	0.967	-0.027	-0.23	0.818	-2.152	1.706	0.781	1.28
	protocol=2.0				3.033	1.243	0.285	2.44	0.017	0.553	5.513	0.804	1.243
	protocol=3.0				0.281	0.711	0.051	0.396	0.694	-1.137	1.7	0.664	1.507
	protocol=5.0				0.438	1.041	0.048	0.421	0.675	-1.637	2.514	0.843	1.186
	protocol=6.0				-0.43	1.244	-0.04	-0.345	0.731	-2.912	2.052	0.803	1.245
available embryos (LPS-AE)	(Constant)	0.187	3.942	0.002	0.141	0.324		0.437	0.663	-0.504	0.787
	LPS-Gndays				0.154	0.038	0.475	4.095	0	0.079	0.23	0.787	1.271
	protocol=1.0				-0.459	0.453	-0.119	-1.014	0.314	-1.363	0.444	0.767	1.303
	protocol=2.0				0.581	0.573	0.115	1.014	0.314	-0.561	1.723	0.817	1.224
	protocol=4.0				-0.254	0.312	-0.097	-0.813	0.419	-0.877	0.369	0.742	1.347
	protocol=5.0				0.196	0.477	0.045	0.411	0.683	-0.755	1.147	0.865	1.156
	protocol=6.0				-0.624	0.561	-0.124	-1.112	0.27	-1.742	0.494	0.852	1.173
high-quality embryos (LPS-HQE)	(Constant)	0.187	3.959	0.002	0.141	0.324		0.437	0.663	-0.504	0.787
	LPS-Gndays				0.154	0.038	0.475	4.095	0	0.079	0.23	0.787	1.271
	protocol=1.0				-0.459	0.453	-0.119	-1.014	0.314	-1.363	0.444	0.767	1.303
	protocol=2.0				0.581	0.573	0.115	1.014	0.314	-0.561	1.723	0.817	1.224
	protocol=4.0				-0.254	0.312	-0.097	-0.813	0.419	-0.877	0.369	0.742	1.347
	protocol=5.0				0.196	0.477	0.045	0.411	0.683	-0.755	1.147	0.865	1.156
	protocol=6.0				-0.624	0.561	-0.124	-1.112	0.27	-1.742	0.494	0.852	1.173

## Sheet: factors between groups
(table III)
Descriptives												Test of Homogeneity of Variances
		N	Mean	Std. Deviation	Std. Error	95% Confidence Interval for Mean		Minimum	Maximum					Levene Statistic	df1	df2	Sig.
						Lower Bound	Upper Bound					female age	Based on Mean	1.256	5	72	0.292
age	short protocol	9	39.11	5.84	1.947	34.62	43.6	33	51				Based on Median	0.893	5	72	0.491
	long protocol	5	35.8	7.12	3.184	26.96	44.64	28	44				Based on Median and with adjusted df	0.893	5	65.03	0.491
	antagonist protocol	26	35.62	5.239	1.027	33.5	37.73	23	45				Based on trimmed mean	1.24	5	72	0.3
	PPOS protocol	26	39.96	4.123	0.809	38.3	41.63	31	47			interval	Based on Mean	3.686	5	72	0.005
	mild-stimulation protocol	7	37	6.245	2.36	31.22	42.78	29	45				Based on Median	3.57	5	72	0.006
	natural-cycle protocol	5	35.8	5.215	2.332	29.32	42.28	30	44				Based on Median and with adjusted df	3.57	5	57.318	0.007
	Total	78	37.62	5.385	0.61	36.4	38.83	23	51				Based on trimmed mean	3.598	5	72	0.006
interval days	short protocol	9	3.56	2.128	0.709	1.92	5.19	2	8			FPS-Gnpriming dose	Based on Mean	2.175	4	68	0.081
	long protocol	5	2.4	2.191	0.98	-0.32	5.12	1	6				Based on Median	1.121	4	68	0.354
	antagonist protocol	26	8.12	5.436	1.066	5.92	10.31	1	18				Based on Median and with adjusted df	1.121	4	54.492	0.356
	PPOS protocol	26	6.15	2.989	0.586	4.95	7.36	2	14				Based on trimmed mean	2.175	4	68	0.081
	mild-stimulation protocol	7	9	4.83	1.826	4.53	13.47	2	16			LPS-Gnpriming dose	Based on Mean	4.276	5	72	0.002
	natural-cycle protocol	5	11	2.345	1.049	8.09	13.91	8	13				Based on Median	3.217	5	72	0.011
	Total	78	6.83	4.485	0.508	5.82	7.84	1	18				Based on Median and with adjusted df	3.217	5	65.042	0.012
FPS-Gn priming dose	short protocol	9	287.5	26.5165	8.83883	267.118	307.882	225	300				Based on trimmed mean	4.272	5	72	0.002
	long protocol	5	230	59.6867	26.6927	155.889	304.111	150	300			FPS-Gndays	Based on Mean	0.412	4	68	0.799
	antagonist protocol	26	229.808	47.9683	9.40737	210.433	249.183	150	300				Based on Median	0.284	4	68	0.887
	PPOS protocol	26	258.173	52.3142	10.2597	237.043	279.303	150	300				Based on Median and with adjusted df	0.284	4	52.706	0.887
	mild-stimulation protocol	7	150	43.3013	16.3663	109.953	190.047	75	225				Based on trimmed mean	0.315	4	68	0.867
	natural-cycle protocol	0	.	.	.	.	.	.	.			LPS-Gndays	Based on Mean	3.635	5	72	0.005
	Total	73	239.384	58.4326	6.83902	225.75	253.017	75	300				Based on Median	2.967	5	72	0.017
LPS-Gn priming dose	short protocol	9	187.5	45.9279	15.3093	152.197	222.803	150	262.5				Based on Median and with adjusted df	2.967	5	65.784	0.018
	long protocol	5	150	0	0	150	150	150	150				Based on trimmed mean	3.474	5	72	0.007
	antagonist protocol	26	219.231	47.0679	9.23077	200.22	238.242	150	300			FPS-Gntotal dose	Based on Mean	0.827	4	68	0.512
	PPOS protocol	26	258.173	69.0056	13.5331	230.301	286.045	150	375				Based on Median	0.595	4	68	0.667
	mild-stimulation protocol	7	214.286	51.7549	19.5615	166.42	262.151	150	300				Based on Median and with adjusted df	0.595	4	56.169	0.667
	natural-cycle protocol	5	255	41.0792	18.3712	203.993	306.007	225	300				Based on trimmed mean	0.744	4	68	0.565
	Total	78	225.962	61.3289	6.94413	212.134	239.789	150	375			LPS-Gntotal dose	Based on Mean	4.038	5	72	0.003
FPS-Gn days	short protocol	9	8.78	2.587	0.862	6.79	10.77	5	13				Based on Median	2.759	5	72	0.025
	long protocol	5	12.6	2.702	1.208	9.25	15.95	10	17				Based on Median and with adjusted df	2.759	5	59.994	0.026
	antagonist protocol	26	7.46	4.536	0.89	5.63	9.29	2	25				Based on trimmed mean	3.782	5	72	0.004
	PPOS protocol	26	8.15	4.125	0.809	6.49	9.82	3	22
	mild-stimulation protocol	7	4.43	2.37	0.896	2.24	6.62	1	8
	natural-cycle protocol	0	.	.	.	.	.	.	.
	Total	73	7.93	4.191	0.491	6.95	8.91	1	25
LPS-Gn days	short protocol	9	2.78	1.787	0.596	1.4	4.15	1	6
	long protocol	5	1.8	1.789	0.8	-0.42	4.02	1	5
	antagonist protocol	26	6.31	4.515	0.885	4.48	8.13	1	14
	PPOS protocol	26	5.46	3.049	0.598	4.23	6.69	2	13
	mild-stimulation protocol	7	6.14	3.579	1.353	2.83	9.45	2	12
	natural-cycle protocol	5	9.6	2.51	1.122	6.48	12.72	7	12
	Total	78	5.53	3.816	0.432	4.67	6.39	1	14
FPS-Gn total dose	short protocol	9	2362.5	885.429	295.143	1681.9	3043.1	1350	4200
	long protocol	5	3030	800.273	357.893	2036.33	4023.67	2325	4125
	antagonist protocol	26	1764.44	1311.51	257.207	1234.71	2294.17	187.5	7050
	PPOS protocol	26	2156.25	1276.11	250.266	1640.82	2671.68	600	5400
	mild-stimulation protocol	7	728.571	524.49	198.238	243.5	1213.64	75	1725
	natural-cycle protocol	0	.	.	.	.	.	.	.
	Total	73	1965.08	1258.24	147.266	1671.51	2258.64	75	7050
LPS-Gn total dose	short protocol	9	568.056	501.759	167.253	182.369	953.742	150	1800
	long protocol	5	270	268.328	120	-63.1734	603.173	150	750
	antagonist protocol	26	1583.65	1324.86	259.827	1048.53	2118.78	150	4650
	PPOS protocol	26	1483.65	970.263	190.284	1091.76	1875.55	300	4200
	mild-stimulation protocol	7	1323.21	839.284	317.219	547.006	2099.42	300	2662.5
	natural-cycle protocol	5	2647.5	819.699	366.58	1629.71	3665.29	1875	3787.5
	Total	78	1393.75	1128.87	127.819	1139.23	1648.27	150	4650
Multiple Comparisons
Dependent Variable		protocol	protocol	Mean Difference (I-J)	Std. Error	Sig.	95% Confidence Interval
							Lower Bound	Upper Bound				short protocol	long protocol	antagonist protocol	PPOS protocol	mild-stimulation protocol	natural-cycle protocol	total	F	P
age	LSD	short protocol	long protocol	3.311	2.888	0.255	-2.45	9.07			cases	9	5	26	26	7	5	78
			antagonist protocol	3.496	2.002	0.085	-0.5	7.49			female age (years)	39.11±5.84	35.80±7.12	35.62±5.24	39.96±4.12	37.00±6.25	35.80±5.22	37.62±5.39	2.26	0.057
			PPOS protocol	-0.85	2.002	0.672	-4.84	3.14			retreval interval (days)	3.56±2.13	2.40±2.19	8.12±5.44	6.15±2.99	9.00±4.83	11.00±2.35	6.83±4.49	4.51	0.001
			mild-stimulation protocol	2.111	2.609	0.421	-3.09	7.31			FPS-Gn priming dose (IU)	287.50±26.52	230.00±59.69	229.81±47.97	258.17±52.31	150.00±43.30	0	239.38±58.43	9.607	0
			natural-cycle protocol	3.311	2.888	0.255	-2.45	9.07			LPS-Gn priming dose (IU)	187.50±45.93	150.00±0.00	219.23±47.07	258.17±69.01	214.29±51.75	255.00±41.08	225.96±61.33	5.077	0
		long protocol	short protocol	-3.311	2.888	0.255	-9.07	2.45			FPS-Gn (days)	8.78±2.59	12.60±2.70	7.46±4.54	8.15±4.13	4.43±2.37	0	7.93±4.19	3.353	0.015
			antagonist protocol	0.185	2.528	0.942	-4.85	5.22			LPS-Gn (days)	2.78±1.79	1.80±1.79	6.31±4.52	5.46±3.05	6.14±3.58	9.60±2.51	5.53±3.82	3.901	0.003
			PPOS protocol	-4.162	2.528	0.104	-9.2	0.88			FPS-Gn total dose (IU)	2362.50±885.43	3030.00±800.27	1764.44±1311.51	2156.25±1276.11	728.57±524.49	0	1965.08±1258.24	3.572	0.011
			mild-stimulation protocol	-1.2	3.031	0.693	-7.24	4.84			LPS-Gn total dose (IU)	568.06±501.76	270.00±268.33	1583.65±1324.86	1483.65±970.26	1323.21±839.28	2647.50±819.70	1393.75±1128.87	4.039	0.003
			natural-cycle protocol	0	3.274	1	-6.53	6.53
		antagonist protocol	short protocol	-3.496	2.002	0.085	-7.49	0.5
			long protocol	-0.185	2.528	0.942	-5.22	4.85				287.5	230	229.808	258.173	150	.	239.384
			PPOS protocol	-4.346*	1.436	0.003	-7.21	-1.48
			mild-stimulation protocol	-1.385	2.204	0.532	-5.78	3.01
			natural-cycle protocol	-0.185	2.528	0.942	-5.22	4.85
		PPOS protocol	short protocol	0.85	2.002	0.672	-3.14	4.84
			long protocol	4.162	2.528	0.104	-0.88	9.2
			antagonist protocol	4.346*	1.436	0.003	1.48	7.21
			mild-stimulation protocol	2.962	2.204	0.183	-1.43	7.36
			natural-cycle protocol	4.162	2.528	0.104	-0.88	9.2
		mild-stimulation protocol	short protocol	-2.111	2.609	0.421	-7.31	3.09
			long protocol	1.2	3.031	0.693	-4.84	7.24
			antagonist protocol	1.385	2.204	0.532	-3.01	5.78
			PPOS protocol	-2.962	2.204	0.183	-7.36	1.43
			natural-cycle protocol	1.2	3.031	0.693	-4.84	7.24
		natural-cycle protocol	short protocol	-3.311	2.888	0.255	-9.07	2.45
			long protocol	0	3.274	1	-6.53	6.53
			antagonist protocol	0.185	2.528	0.942	-4.85	5.22
			PPOS protocol	-4.162	2.528	0.104	-9.2	0.88
			mild-stimulation protocol	-1.2	3.031	0.693	-7.24	4.84
			5	-1.2	3.031	0.693	-7.24	4.84
interval days	Tamhane	short protocol	long protocol	1.156	1.21	0.999	-3.77	6.08
			antagonist protocol	-4.560*	1.28	0.017	-8.61	-0.51
			PPOS protocol	-2.598	0.92	0.148	-5.66	0.46
			mild-stimulation protocol	-5.444	1.959	0.311	-13.56	2.67
			natural-cycle protocol	-7.444*	1.266	0.006	-12.72	-2.17
		long protocol	short protocol	-1.156	1.21	0.999	-6.08	3.77
			antagonist protocol	-5.715*	1.448	0.018	-10.71	-0.72
			PPOS protocol	-3.754	1.142	0.175	-8.64	1.13
			mild-stimulation protocol	-6.6	2.072	0.157	-14.81	1.61
			natural-cycle protocol	-8.600*	1.435	0.005	-14.5	-2.7
		antagonist protocol	short protocol	4.560*	1.28	0.017	0.51	8.61
			long protocol	5.715*	1.448	0.018	0.72	10.71
			PPOS protocol	1.962	1.217	0.84	-1.83	5.76
			mild-stimulation protocol	-0.885	2.114	1	-8.84	7.07
			natural-cycle protocol	-2.885	1.495	0.685	-8.14	2.37
		PPOS protocol	short protocol	2.598	0.92	0.148	-0.46	5.66
			long protocol	3.754	1.142	0.175	-1.13	8.64
			antagonist protocol	-1.962	1.217	0.84	-5.76	1.83
			mild-stimulation protocol	-2.846	1.918	0.949	-11.02	5.33
			natural-cycle protocol	-4.846	1.202	0.077	-10.13	0.44
		mild-stimulation protocol	short protocol	5.444	1.959	0.311	-2.67	13.56
			long protocol	6.6	2.072	0.157	-1.61	14.81
			antagonist protocol	0.885	2.114	1	-7.07	8.84
			PPOS protocol	2.846	1.918	0.949	-5.33	11.02
			natural-cycle protocol	-2	2.106	0.999	-10.26	6.26
		natural-cycle protocol	short protocol	7.444*	1.266	0.006	2.17	12.72
			long protocol	8.600*	1.435	0.005	2.7	14.5
			antagonist protocol	2.885	1.495	0.685	-2.37	8.14
			PPOS protocol	4.846	1.202	0.077	-0.44	10.13
			mild-stimulation protocol	2	2.106	0.999	-6.26	10.26
LPS-Gn priming dose	Tamhane	short protocol	long protocol	37.5	15.3093	0.458	-25.346	100.346
			antagonist protocol	-31.7308	17.8769	0.784	-94.3811	30.9195
			PPOS protocol	-70.67308*	20.4333	0.034	-137.999	-3.3475
			mild-stimulation protocol	-26.7857	24.8401	0.995	-116.798	63.2265
			natural-cycle protocol	-67.5	23.9139	0.255	-160.846	25.8463
		long protocol	short protocol	-37.5	15.3093	0.458	-100.346	25.346
			antagonist protocol	-69.23077*	9.23077	0	-99.0883	-39.3732
			PPOS protocol	-108.17308*	13.5331	0	-151.947	-64.3993
			mild-stimulation protocol	-64.2857	19.5615	0.223	-155.735	27.1639
			natural-cycle protocol	-105	18.3712	0.067	-219.155	9.1546
		antagonist protocol	short protocol	31.7308	17.8769	0.784	-30.9195	94.3811
			long protocol	69.23077*	9.23077	0	39.3732	99.0883
			PPOS protocol	-38.9423	16.3815	0.282	-89.6405	11.7559
			mild-stimulation protocol	4.94505	21.6301	1	-80.6745	90.5646
			natural-cycle protocol	-35.7692	20.5598	0.878	-130.153	58.615
		PPOS protocol	short protocol	70.67308*	20.4333	0.034	3.3475	137.999
			long protocol	108.17308*	13.5331	0	64.3993	151.947
			antagonist protocol	38.9423	16.3815	0.282	-11.7559	89.6405
			mild-stimulation protocol	43.8874	23.7865	0.753	-41.8955	129.67
			natural-cycle protocol	3.17308	22.8177	1	-86.4011	92.7472
		mild-stimulation protocol	short protocol	26.7857	24.8401	0.995	-63.2265	116.798
			long protocol	64.2857	19.5615	0.223	-27.1639	155.735
			antagonist protocol	-4.94505	21.6301	1	-90.5646	80.6745
			PPOS protocol	-43.8874	23.7865	0.753	-129.67	41.8955
			natural-cycle protocol	-40.7143	26.8357	0.928	-143.616	62.1876
		natural-cycle protocol	short protocol	67.5	23.9139	0.255	-25.8463	160.846
			long protocol	105	18.3712	0.067	-9.1546	219.155
			antagonist protocol	35.7692	20.5598	0.878	-58.615	130.153
			PPOS protocol	-3.17308	22.8177	1	-92.7472	86.4011
			mild-stimulation protocol	40.7143	26.8357	0.928	-62.1876	143.616
LPS-Gn days	Tamhane	short protocol	long protocol	0.978	0.997	0.999	-3.05	5
			antagonist protocol	-3.530*	1.067	0.034	-6.9	-0.16
			PPOS protocol	-2.684	0.844	0.058	-5.42	0.05
			mild-stimulation protocol	-3.365	1.478	0.545	-9.35	2.62
			natural-cycle protocol	-6.822*	1.271	0.022	-12.6	-1.04
		long protocol	short protocol	-0.978	0.997	0.999	-5	3.05
			antagonist protocol	-4.508*	1.193	0.025	-8.61	-0.41
			PPOS protocol	-3.662	0.999	0.072	-7.56	0.24
			mild-stimulation protocol	-4.343	1.572	0.278	-10.48	1.8
			natural-cycle protocol	-7.800*	1.378	0.01	-13.69	-1.91
		antagonist protocol	short protocol	3.530*	1.067	0.034	0.16	6.9
			long protocol	4.508*	1.193	0.025	0.41	8.61
			PPOS protocol	0.846	1.068	1	-2.46	4.15
			mild-stimulation protocol	0.165	1.617	1	-5.75	6.08
			natural-cycle protocol	-3.292	1.43	0.493	-8.76	2.17
		PPOS protocol	short protocol	2.684	0.844	0.058	-0.05	5.42
			long protocol	3.662	0.999	0.072	-0.24	7.56
			antagonist protocol	-0.846	1.068	1	-4.15	2.46
			mild-stimulation protocol	-0.681	1.479	1	-6.62	5.26
			natural-cycle protocol	-4.138	1.272	0.209	-9.84	1.57
		mild-stimulation protocol	short protocol	3.365	1.478	0.545	-2.62	9.35
			long protocol	4.343	1.572	0.278	-1.8	10.48
			antagonist protocol	-0.165	1.617	1	-6.08	5.75
			PPOS protocol	0.681	1.479	1	-5.26	6.62
			natural-cycle protocol	-3.457	1.758	0.702	-10.16	3.25
		natural-cycle protocol	short protocol	6.822*	1.271	0.022	1.04	12.6
			long protocol	7.800*	1.378	0.01	1.91	13.69
			antagonist protocol	3.292	1.43	0.493	-2.17	8.76
			PPOS protocol	4.138	1.272	0.209	-1.57	9.84
			mild-stimulation protocol	3.457	1.758	0.702	-3.25	10.16
LPS-Gn total dose	Tamhane	short protocol	long protocol	298.056	205.848	0.942	-450.418	1046.53
			antagonist protocol	-1015.59829*	309.004	0.036	-1991.58	-39.6215
			PPOS protocol	-915.59829*	253.341	0.018	-1727.63	-103.57
			mild-stimulation protocol	-755.159	358.611	0.627	-2154.52	644.206
			natural-cycle protocol	-2079.44444*	402.933	0.036	-4014.61	-144.275
		long protocol	short protocol	-298.056	205.848	0.942	-1046.53	450.418
			antagonist protocol	-1313.65385*	286.199	0.001	-2227.29	-400.016
			PPOS protocol	-1213.65385*	224.962	0	-1942.66	-484.647
			mild-stimulation protocol	-1053.21	339.158	0.209	-2473.07	366.643
			natural-cycle protocol	-2377.50000*	385.722	0.027	-4433.87	-321.129
		antagonist protocol	short protocol	1015.59829*	309.004	0.036	39.6215	1991.58
			long protocol	1313.65385*	286.199	0.001	400.016	2227.29
			PPOS protocol	100	322.053	1	-894.607	1094.61
			mild-stimulation protocol	260.44	410.047	1	-1161.25	1682.13
			natural-cycle protocol	-1063.85	449.323	0.483	-2855.21	727.521
		PPOS protocol	short protocol	915.59829*	253.341	0.018	103.57	1727.63
			long protocol	1213.65385*	224.962	0	484.647	1942.66
			antagonist protocol	-100	322.053	1	-1094.61	894.607
			mild-stimulation protocol	160.44	369.914	1	-1221.6	1542.48
			natural-cycle protocol	-1163.85	413.025	0.352	-3035.58	707.889
		mild-stimulation protocol	short protocol	755.159	358.611	0.627	-644.206	2154.52
			long protocol	1053.21	339.158	0.209	-366.643	2473.07
			antagonist protocol	-260.44	410.047	1	-1682.13	1161.25
			PPOS protocol	-160.44	369.914	1	-1542.48	1221.6
			natural-cycle protocol	-1324.29	484.778	0.299	-3240.29	591.721
		natural-cycle protocol	short protocol	2079.44444*	402.933	0.036	144.275	4014.61
			long protocol	2377.50000*	385.722	0.027	321.129	4433.87
			antagonist protocol	1063.85	449.323	0.483	-727.521	2855.21
			PPOS protocol	1163.85	413.025	0.352	-707.889	3035.58
			mild-stimulation protocol	1324.29	484.778	0.299	-591.721	3240.29
* The mean difference is significant at the 0.05 level.

## Sheet: Outcomes between groups
(table IV)
Descriptives												Test of Homogeneity of Variances
		N	Mean	Std. Deviation	Std. Error	95% Confidence Interval for Mean		Minimum	Maximum					Levene Statistic	df1	df2	Sig.
						Lower Bound	Upper Bound					FPS oocytes(N)	Based on Mean	2.384	5	72	0.047
FPS-oocytes	short protocol	9	1.11	0.601	0.2	0.65	1.57	0	2				Based on Median	0.937	5	72	0.462
	long protocol	5	1.6	1.342	0.6	-0.07	3.27	0	3				Based on Median and with adjusted df	0.937	5	38.728	0.468
	antagonist protocol	26	1.88	2.007	0.394	1.07	2.7	0	10				Based on trimmed mean	1.815	5	72	0.121
	PPOS protocol	26	1.35	0.745	0.146	1.05	1.65	0	3			LPS oocytes(N)	Based on Mean	6.948	5	72	0
	mild-stimulation protocol	7	1.71	1.254	0.474	0.55	2.87	0	3				Based on Median	1.742	5	72	0.136
	natural-cycle protocol	5	0.6	0.548	0.245	-0.08	1.28	0	1				Based on Median and with adjusted df	1.742	5	13.222	0.193
	Total	78	1.5	1.375	0.156	1.19	1.81	0	10				Based on trimmed mean	5.298	5	72	0
LPS-oocytes	short protocol	9	0.78	0.972	0.324	0.03	1.52	0	3			FPS-available embryos (N)	Based on Mean	0.738	5	72	0.597
	long protocol	5	4.2	6.611	2.956	-4.01	12.41	1	16				Based on Median	0.769	5	72	0.575
	antagonist protocol	26	2.5	2.929	0.574	1.32	3.68	0	9				Based on Median and with adjusted df	0.769	5	68.634	0.575
	PPOS protocol	26	1.62	1.551	0.304	0.99	2.24	0	5				Based on trimmed mean	0.796	5	72	0.556
	mild-stimulation protocol	7	2.29	1.704	0.644	0.71	3.86	0	5			LPS-available embryos (N)	Based on Mean	1.931	5	72	0.1
	natural-cycle protocol	5	2.6	1.14	0.51	1.18	4.02	1	4				Based on Median	1.421	5	72	0.227
	Total	78	2.1	2.622	0.297	1.51	2.69	0	16				Based on Median and with adjusted df	1.421	5	39.624	0.238
FPS-available embryo (N)	short protocol	9	0.56	0.726	0.242	0	1.11	0	2				Based on trimmed mean	1.737	5	72	0.137
	long protocol	5	0.8	0.837	0.374	-0.24	1.84	0	2			FPS-high-quality embryos (N)	Based on Mean	3.409	5	72	0.008
	antagonist protocol	26	0.73	0.919	0.18	0.36	1.1	0	4				Based on Median	1.854	5	72	0.113
	PPOS protocol	26	0.81	0.749	0.147	0.51	1.11	0	3				Based on Median and with adjusted df	1.854	5	52.111	0.119
	mild-stimulation protocol	7	1	1.155	0.436	-0.07	2.07	0	3				Based on trimmed mean	3.219	5	72	0.011
	natural-cycle protocol	5	0.2	0.447	0.2	-0.36	0.76	0	1			LPS-high-quality embryos (N)	Based on Mean	2.38	5	72	0.047
	Total	78	0.73	0.832	0.094	0.54	0.92	0	4				Based on Median	1.531	5	72	0.191
LPS-available embryo (N)	short protocol	9	0.11	0.333	0.111	-0.15	0.37	0	1				Based on Median and with adjusted df	1.531	5	40.71	0.202
	long protocol	5	1	1.732	0.775	-1.15	3.15	0	4				Based on trimmed mean	2.424	5	72	0.043
	antagonist protocol	26	1.12	1.608	0.315	0.47	1.76	0	6			FPS-available embryos (rate)	Based on Mean	1.243	5	72	0.298
	PPOS protocol	26	0.73	0.778	0.152	0.42	1.04	0	2				Based on Median	0.303	5	72	0.909
	mild-stimulation protocol	7	1.29	1.38	0.522	0.01	2.56	0	3				Based on Median and with adjusted df	0.303	5	60.547	0.909
	natural-cycle protocol	5	1	1.225	0.548	-0.52	2.52	0	3				Based on trimmed mean	1.319	5	72	0.266
	Total	78	0.87	1.242	0.141	0.59	1.15	0	6			LPS-available embryos (rate)	Based on Mean	0.904	5	72	0.483
FPS-high quality embryo (N)	short protocol	9	0.22	0.441	0.147	-0.12	0.56	0	1				Based on Median	1.139	5	72	0.348
	long protocol	5	0.6	0.548	0.245	-0.08	1.28	0	1				Based on Median and with adjusted df	1.139	5	54.053	0.351
	antagonist protocol	26	0.54	0.761	0.149	0.23	0.85	0	3				Based on trimmed mean	1.136	5	72	0.349
	PPOS protocol	26	0.58	0.703	0.138	0.29	0.86	0	3			FPS-high-quality embryos (rate)	Based on Mean	4.731	5	72	0.001
	mild-stimulation protocol	7	1	1.155	0.436	-0.07	2.07	0	3				Based on Median	1.398	5	72	0.235
	natural-cycle protocol	5	0	0	0	0	0	0	0				Based on Median and with adjusted df	1.398	5	60.672	0.238
	Total	78	0.53	0.734	0.083	0.36	0.69	0	3				Based on trimmed mean	4.297	5	72	0.002
LPS-high quality embryo (N)	short protocol	9	0.11	0.333	0.111	-0.15	0.37	0	1			LPS-high-quality embryos (rate)	Based on Mean	0.321	5	72	0.899
	long protocol	5	1	1.732	0.775	-1.15	3.15	0	4				Based on Median	0.39	5	72	0.854
	antagonist protocol	26	0.88	1.243	0.244	0.38	1.39	0	5				Based on Median and with adjusted df	0.39	5	62.396	0.854
	PPOS protocol	26	0.46	0.647	0.127	0.2	0.72	0	2				Based on trimmed mean	0.452	5	72	0.81
	mild-stimulation protocol	7	1.14	1.215	0.459	0.02	2.27	0	3
	natural-cycle protocol	5	0.8	1.304	0.583	-0.82	2.42	0	3
	Total	78	0.68	1.051	0.119	0.44	0.92	0	5
FPS-available embryo (rate)	short protocol	9	0.4444	0.52705	0.17568	0.0393	0.8496	0	1
	long protocol	5	0.4	0.43526	0.19465	-0.1404	0.9404	0	1
	antagonist protocol	26	0.4235	0.47447	0.09305	0.2318	0.6151	0	1
	PPOS protocol	26	0.5962	0.47191	0.09255	0.4055	0.7868	0	1
	mild-stimulation protocol	7	0.5243	0.50411	0.19054	0.0581	0.9905	0	1				short protocol	long protocol	antagonist protocol	PPOS protocol	mild-stimulation protocol	natural-cycle protocol	total	F	P
	natural-cycle protocol	5	0.2	0.44721	0.2	-0.3553	0.7553	0	1			FPS-oocytes	1.11±0.60	1.60±1.34	1.88±2.01	1.35±0.75	1.71±1.25	0.60±0.55	1.50±1.38	1.091	0.373
	Total	78	0.4767	0.47513	0.0538	0.3695	0.5838	0	1			LPS-oocytes	0.78±0.97	4.20±6.61	2.50±2.93	1.62±1.55	2.29±1.70	2.60±1.14	2.10±2.62	1.487	0.205
LPS-available embryo (rate)	short protocol	9	0.1111	0.33333	0.11111	-0.1451	0.3673	0	1			FPS-available embryo (N)	0.56±0.73	0.80±0.84	0.73±0.92	0.81±0.75	1.00±1.16	0.20±0.45	0.73±0.83	0.67	0.648
	long protocol	5	0.25	0.43301	0.19365	-0.2877	0.7877	0	1			LPS-available embryo (N)	0.11±0.33	1.00±1.73	1.12±1.61	0.73±0.78	1.29±1.38	1.00±1.23	0.87±1.24	1.129	0.353
	antagonist protocol	26	0.3073	0.35072	0.06878	0.1656	0.449	0	1			FPS-high quality embryo (N)	0.22±0.44	0.60±0.55	0.54±0.76	0.58±0.70	1.00±1.16	0	0.53±0.73	1.49	0.204
	PPOS protocol	26	0.3231	0.37077	0.07271	0.1733	0.4728	0	1			LPS-high quality embryo (N)	0.11±0.33	1.00±1.73	0.88±1.24	0.46±0.65	1.14±1.22	0.80±1.30	0.68±1.05	1.358	0.25
	mild-stimulation protocol	7	0.3714	0.39835	0.15056	0.003	0.7398	0	1			FPS-available embryo (rate,%)	44.44±52.71	40.00±43.53	42.35±47.45	59.62±47.19	52.43±50.41	20.00±44.72	47.67±47.51	0.77	0.575
	natural-cycle protocol	5	0.466	0.50575	0.22618	-0.162	1.094	0	1			LPS-available embryo (rate,%)	11.11±33.33	25.00±43.30	30.73±35.07	32.31±37.08	37.14±39.84	46.60±50.58	30.22±37.19	0.742	0.594
	Total	78	0.3022	0.37187	0.04211	0.2183	0.386	0	1			FPS-high quality embryo (rate,%)	22.22±44.10	33.20±40.83	30.81±42.77	41.00±46.25	52.43±50.41	0	33.33±43.78	1.15	0.342
FPS-high quality embryo (rate)	short protocol	9	0.2222	0.44096	0.14699	-0.1167	0.5612	0	1			LPS-high quality embryo (rate	11.11±33.33	25.00±43.30	26.77±34.37	20.96±34.02	34.29±38.62	26.60±43.45	23.58±34.95	0.426	0.829
	long protocol	5	0.332	0.40825	0.18258	-0.1749	0.8389	0	1
	antagonist protocol	26	0.3081	0.42767	0.08387	0.1353	0.4808	0	1
	PPOS protocol	26	0.41	0.46248	0.0907	0.2232	0.5968	0	1
	mild-stimulation protocol	7	0.5243	0.50411	0.19054	0.0581	0.9905	0	1
	natural-cycle protocol	5	0	0	0	0	0	0	0
	Total	78	0.3333	0.43779	0.04957	0.2346	0.432	0	1
LPS-high quality embryo (rate)	short protocol	9	0.1111	0.33333	0.11111	-0.1451	0.3673	0	1
	long protocol	5	0.25	0.43301	0.19365	-0.2877	0.7877	0	1
	antagonist protocol	26	0.2677	0.34369	0.0674	0.1289	0.4065	0	1
	PPOS protocol	26	0.2096	0.34017	0.06671	0.0722	0.347	0	1
	mild-stimulation protocol	7	0.3429	0.38621	0.14597	-0.0143	0.7	0	1
	natural-cycle protocol	5	0.266	0.43449	0.19431	-0.2735	0.8055	0	1
	Total	78	0.2358	0.34949	0.03957	0.157	0.3146	0	1
Multiple Comparisons
							95% Confidence Interval
Dependent Variable		protocol	protocol	Mean Difference (I-J)	Std. Error	Sig.	Lower Bound	Upper Bound
FPS-oocytes	Tamhane	short protocol	long protocol	-0.489	0.633	1	-3.83	2.85
			antagonist protocol	-0.774	0.442	0.754	-2.17	0.62
			PPOS protocol	-0.235	0.248	0.999	-1.08	0.61
			mild-stimulation protocol	-0.603	0.514	0.992	-2.7	1.49
			natural-cycle protocol	0.511	0.316	0.896	-0.73	1.75
		long protocol	short protocol	0.489	0.633	1	-2.85	3.83
			antagonist protocol	-0.285	0.718	1	-3.24	2.67
			PPOS protocol	0.254	0.618	1	-3.23	3.74
			mild-stimulation protocol	-0.114	0.765	1	-3.2	2.97
			natural-cycle protocol	1	0.648	0.949	-2.26	4.26
		antagonist protocol	short protocol	0.774	0.442	0.754	-0.62	2.17
			long protocol	0.285	0.718	1	-2.67	3.24
			PPOS protocol	0.538	0.42	0.97	-0.79	1.87
			mild-stimulation protocol	0.17	0.616	1	-1.96	2.3
			natural-cycle protocol	1.285	0.464	0.145	-0.22	2.78
		PPOS protocol	short protocol	0.235	0.248	0.999	-0.61	1.08
			long protocol	-0.254	0.618	1	-3.74	3.23
			antagonist protocol	-0.538	0.42	0.97	-1.87	0.79
			mild-stimulation protocol	-0.368	0.496	1	-2.49	1.76
			natural-cycle protocol	0.746	0.285	0.402	-0.47	1.97
		mild-stimulation protocol	short protocol	0.603	0.514	0.992	-1.49	2.7
			long protocol	0.114	0.765	1	-2.97	3.2
			antagonist protocol	-0.17	0.616	1	-2.3	1.96
			PPOS protocol	0.368	0.496	1	-1.76	2.49
			natural-cycle protocol	1.114	0.533	0.648	-1.01	3.24
		natural-cycle protocol	short protocol	-0.511	0.316	0.896	-1.75	0.73
			long protocol	-1	0.648	0.949	-4.26	2.26
			antagonist protocol	-1.285	0.464	0.145	-2.78	0.22
			PPOS protocol	-0.746	0.285	0.402	-1.97	0.47
			mild-stimulation protocol	-1.114	0.533	0.648	-3.24	1.01
LPS-oocytes	Tamhane	short protocol	long protocol	-3.422	2.974	0.996	-21.52	14.67
			antagonist protocol	-1.722	0.659	0.184	-3.8	0.36
			PPOS protocol	-0.838	0.444	0.676	-2.29	0.62
			mild-stimulation protocol	-1.508	0.721	0.641	-4.35	1.33
			natural-cycle protocol	-1.822	0.604	0.245	-4.4	0.75
		long protocol	short protocol	3.422	2.974	0.996	-14.67	21.52
			antagonist protocol	1.7	3.012	1	-15.86	19.26
			PPOS protocol	2.585	2.972	1	-15.54	20.71
			mild-stimulation protocol	1.914	3.026	1	-15.49	19.31
			natural-cycle protocol	1.6	3	1	-16.13	19.33
		antagonist protocol	short protocol	1.722	0.659	0.184	-0.36	3.8
			long protocol	-1.7	3.012	1	-19.26	15.86
			PPOS protocol	0.885	0.65	0.95	-1.15	2.91
			mild-stimulation protocol	0.214	0.863	1	-2.73	3.15
			natural-cycle protocol	-0.1	0.768	1	-2.73	2.53
		PPOS protocol	short protocol	0.838	0.444	0.676	-0.62	2.29
			long protocol	-2.585	2.972	1	-20.71	15.54
			antagonist protocol	-0.885	0.65	0.95	-2.91	1.15
			mild-stimulation protocol	-0.67	0.712	0.999	-3.49	2.15
			natural-cycle protocol	-0.985	0.594	0.896	-3.53	1.56
		mild-stimulation protocol	short protocol	1.508	0.721	0.641	-1.33	4.35
			long protocol	-1.914	3.026	1	-19.31	15.49
			antagonist protocol	-0.214	0.863	1	-3.15	2.73
			PPOS protocol	0.67	0.712	0.999	-2.15	3.49
			natural-cycle protocol	-0.314	0.822	1	-3.45	2.82
		natural-cycle protocol	short protocol	1.822	0.604	0.245	-0.75	4.4
			long protocol	-1.6	3	1	-19.33	16.13
			antagonist protocol	0.1	0.768	1	-2.53	2.73
			PPOS protocol	0.985	0.594	0.896	-1.56	3.53
			mild-stimulation protocol	0.314	0.822	1	-2.82	3.45
FPS-available embryo (N)	LSD	short protocol	long protocol	-0.244	0.469	0.604	-1.18	0.69
			antagonist protocol	-0.175	0.325	0.592	-0.82	0.47
			PPOS protocol	-0.252	0.325	0.441	-0.9	0.4
			mild-stimulation protocol	-0.444	0.424	0.298	-1.29	0.4
			natural-cycle protocol	0.356	0.469	0.451	-0.58	1.29
		long protocol	short protocol	0.244	0.469	0.604	-0.69	1.18
			antagonist protocol	0.069	0.411	0.867	-0.75	0.89
			PPOS protocol	-0.008	0.411	0.985	-0.83	0.81
			mild-stimulation protocol	-0.2	0.493	0.686	-1.18	0.78
			natural-cycle protocol	0.6	0.532	0.263	-0.46	1.66
		antagonist protocol	short protocol	0.175	0.325	0.592	-0.47	0.82
			long protocol	-0.069	0.411	0.867	-0.89	0.75
			PPOS protocol	-0.077	0.233	0.743	-0.54	0.39
			mild-stimulation protocol	-0.269	0.358	0.455	-0.98	0.45
			natural-cycle protocol	0.531	0.411	0.201	-0.29	1.35
		PPOS protocol	short protocol	0.252	0.325	0.441	-0.4	0.9
			long protocol	0.008	0.411	0.985	-0.81	0.83
			antagonist protocol	0.077	0.233	0.743	-0.39	0.54
			mild-stimulation protocol	-0.192	0.358	0.593	-0.91	0.52
			natural-cycle protocol	0.608	0.411	0.144	-0.21	1.43
		mild-stimulation protocol	short protocol	0.444	0.424	0.298	-0.4	1.29
			long protocol	0.2	0.493	0.686	-0.78	1.18
			antagonist protocol	0.269	0.358	0.455	-0.45	0.98
			PPOS protocol	0.192	0.358	0.593	-0.52	0.91
			natural-cycle protocol	0.8	0.493	0.109	-0.18	1.78
		natural-cycle protocol	short protocol	-0.356	0.469	0.451	-1.29	0.58
			long protocol	-0.6	0.532	0.263	-1.66	0.46
			antagonist protocol	-0.531	0.411	0.201	-1.35	0.29
			PPOS protocol	-0.608	0.411	0.144	-1.43	0.21
			mild-stimulation protocol	-0.8	0.493	0.109	-1.78	0.18
LPS-available embryo (N)	LSD	short protocol	long protocol	-0.889	0.69	0.202	-2.26	0.49
			antagonist protocol	-1.004*	0.478	0.039	-1.96	-0.05
			PPOS protocol	-0.62	0.478	0.199	-1.57	0.33
			mild-stimulation protocol	-1.175	0.623	0.063	-2.42	0.07
			natural-cycle protocol	-0.889	0.69	0.202	-2.26	0.49
		long protocol	short protocol	0.889	0.69	0.202	-0.49	2.26
			antagonist protocol	-0.115	0.604	0.849	-1.32	1.09
			PPOS protocol	0.269	0.604	0.657	-0.93	1.47
			mild-stimulation protocol	-0.286	0.724	0.694	-1.73	1.16
			natural-cycle protocol	0	0.782	1	-1.56	1.56
		antagonist protocol	short protocol	1.004*	0.478	0.039	0.05	1.96
			long protocol	0.115	0.604	0.849	-1.09	1.32
			PPOS protocol	0.385	0.343	0.266	-0.3	1.07
			mild-stimulation protocol	-0.17	0.527	0.747	-1.22	0.88
			natural-cycle protocol	0.115	0.604	0.849	-1.09	1.32
		PPOS protocol	short protocol	0.62	0.478	0.199	-0.33	1.57
			long protocol	-0.269	0.604	0.657	-1.47	0.93
			antagonist protocol	-0.385	0.343	0.266	-1.07	0.3
			mild-stimulation protocol	-0.555	0.527	0.295	-1.6	0.49
			natural-cycle protocol	-0.269	0.604	0.657	-1.47	0.93
		mild-stimulation protocol	short protocol	1.175	0.623	0.063	-0.07	2.42
			long protocol	0.286	0.724	0.694	-1.16	1.73
			antagonist protocol	0.17	0.527	0.747	-0.88	1.22
			PPOS protocol	0.555	0.527	0.295	-0.49	1.6
			natural-cycle protocol	0.286	0.724	0.694	-1.16	1.73
		natural-cycle protocol	short protocol	0.889	0.69	0.202	-0.49	2.26
			long protocol	0	0.782	1	-1.56	1.56
			antagonist protocol	-0.115	0.604	0.849	-1.32	1.09
			PPOS protocol	0.269	0.604	0.657	-0.93	1.47
			mild-stimulation protocol	-0.286	0.724	0.694	-1.73	1.16
FPS-high quality embryo (N)	Tamhane	short protocol	long protocol	-0.378	0.286	0.979	-1.62	0.86
			antagonist protocol	-0.316	0.209	0.902	-0.99	0.36
			PPOS protocol	-0.355	0.201	0.764	-1.01	0.3
			mild-stimulation protocol	-0.778	0.461	0.882	-2.73	1.18
			natural-cycle protocol	0.222	0.147	0.938	-0.38	0.83
		long protocol	short protocol	0.378	0.286	0.979	-0.86	1.62
			antagonist protocol	0.062	0.287	1	-1.16	1.28
			PPOS protocol	0.023	0.281	1	-1.21	1.26
			mild-stimulation protocol	-0.4	0.5	1	-2.37	1.57
			natural-cycle protocol	0.6	0.245	0.666	-0.92	2.12
		antagonist protocol	short protocol	0.316	0.209	0.902	-0.36	0.99
			long protocol	-0.062	0.287	1	-1.28	1.16
			PPOS protocol	-0.038	0.203	1	-0.66	0.59
			mild-stimulation protocol	-0.462	0.461	0.998	-2.41	1.48
			natural-cycle protocol	.538*	0.149	0.02	0.06	1.02
		PPOS protocol	short protocol	0.355	0.201	0.764	-0.3	1.01
			long protocol	-0.023	0.281	1	-1.26	1.21
			antagonist protocol	0.038	0.203	1	-0.59	0.66
			mild-stimulation protocol	-0.423	0.458	0.999	-2.38	1.53
			natural-cycle protocol	.577*	0.138	0.005	0.13	1.02
		mild-stimulation protocol	short protocol	0.778	0.461	0.882	-1.18	2.73
			long protocol	0.4	0.5	1	-1.57	2.37
			antagonist protocol	0.462	0.461	0.998	-1.48	2.41
			PPOS protocol	0.423	0.458	0.999	-1.53	2.38
			natural-cycle protocol	1	0.436	0.616	-1.04	3.04
		natural-cycle protocol	short protocol	-0.222	0.147	0.938	-0.83	0.38
			long protocol	-0.6	0.245	0.666	-2.12	0.92
			antagonist protocol	-.538*	0.149	0.02	-1.02	-0.06
			PPOS protocol	-.577*	0.138	0.005	-1.02	-0.13
			mild-stimulation protocol	-1	0.436	0.616	-3.04	1.04
LPS-high quality embryo (N)	Tamhane	short protocol	long protocol	-0.889	0.783	0.997	-5.58	3.8
			antagonist protocol	-0.774	0.268	0.099	-1.62	0.07
			PPOS protocol	-0.35	0.169	0.516	-0.89	0.19
			mild-stimulation protocol	-1.032	0.472	0.646	-3.12	1.06
			natural-cycle protocol	-0.689	0.594	0.996	-4.16	2.78
		long protocol	short protocol	0.889	0.783	0.997	-3.8	5.58
			antagonist protocol	0.115	0.812	1	-4.23	4.46
			PPOS protocol	0.538	0.785	1	-4.12	5.2
			mild-stimulation protocol	-0.143	0.9	1	-4.11	3.83
			natural-cycle protocol	0.2	0.97	1	-3.9	4.3
		antagonist protocol	short protocol	0.774	0.268	0.099	-0.07	1.62
			long protocol	-0.115	0.812	1	-4.46	4.23
			PPOS protocol	0.423	0.275	0.881	-0.44	1.28
			mild-stimulation protocol	-0.258	0.52	1	-2.26	1.74
			natural-cycle protocol	0.085	0.632	1	-3.02	3.19
		PPOS protocol	short protocol	0.35	0.169	0.516	-0.19	0.89
			long protocol	-0.538	0.785	1	-5.2	4.12
			antagonist protocol	-0.423	0.275	0.881	-1.28	0.44
			mild-stimulation protocol	-0.681	0.476	0.962	-2.75	1.39
			natural-cycle protocol	-0.338	0.597	1	-3.77	3.09
		mild-stimulation protocol	short protocol	1.032	0.472	0.646	-1.06	3.12
			long protocol	0.143	0.9	1	-3.83	4.11
			antagonist protocol	0.258	0.52	1	-1.74	2.26
			PPOS protocol	0.681	0.476	0.962	-1.39	2.75
			natural-cycle protocol	0.343	0.742	1	-2.66	3.34
		natural-cycle protocol	short protocol	0.689	0.594	0.996	-2.78	4.16
			long protocol	-0.2	0.97	1	-4.3	3.9
			antagonist protocol	-0.085	0.632	1	-3.19	3.02
			PPOS protocol	0.338	0.597	1	-3.09	3.77
			mild-stimulation protocol	-0.343	0.742	1	-3.34	2.66
FPS-available embryo (rate)	LSD	short protocol	long protocol	0.04444	0.26702	0.868	-0.4878	0.5767
			antagonist protocol	0.02098	0.18514	0.91	-0.3481	0.3901
			PPOS protocol	-0.15171	0.18514	0.415	-0.5208	0.2174
			mild-stimulation protocol	-0.07984	0.24125	0.742	-0.5608	0.4011
			natural-cycle protocol	0.24444	0.26702	0.363	-0.2878	0.7767
		long protocol	short protocol	-0.04444	0.26702	0.868	-0.5767	0.4878
			antagonist protocol	-0.02346	0.23377	0.92	-0.4895	0.4425
			PPOS protocol	-0.19615	0.23377	0.404	-0.6622	0.2699
			mild-stimulation protocol	-0.12429	0.28031	0.659	-0.6831	0.4345
			natural-cycle protocol	0.2	0.30277	0.511	-0.4036	0.8036
		antagonist protocol	short protocol	-0.02098	0.18514	0.91	-0.3901	0.3481
			long protocol	0.02346	0.23377	0.92	-0.4425	0.4895
			PPOS protocol	-0.17269	0.13277	0.198	-0.4374	0.092
			mild-stimulation protocol	-0.10082	0.20384	0.622	-0.5072	0.3055
			natural-cycle protocol	0.22346	0.23377	0.342	-0.2425	0.6895
		PPOS protocol	short protocol	0.15171	0.18514	0.415	-0.2174	0.5208
			long protocol	0.19615	0.23377	0.404	-0.2699	0.6622
			antagonist protocol	0.17269	0.13277	0.198	-0.092	0.4374
			mild-stimulation protocol	0.07187	0.20384	0.725	-0.3345	0.4782
			natural-cycle protocol	0.39615	0.23377	0.094	-0.0699	0.8622
		mild-stimulation protocol	short protocol	0.07984	0.24125	0.742	-0.4011	0.5608
			long protocol	0.12429	0.28031	0.659	-0.4345	0.6831
			antagonist protocol	0.10082	0.20384	0.622	-0.3055	0.5072
			PPOS protocol	-0.07187	0.20384	0.725	-0.4782	0.3345
			natural-cycle protocol	0.32429	0.28031	0.251	-0.2345	0.8831
		natural-cycle protocol	short protocol	-0.24444	0.26702	0.363	-0.7767	0.2878
			long protocol	-0.2	0.30277	0.511	-0.8036	0.4036
			antagonist protocol	-0.22346	0.23377	0.342	-0.6895	0.2425
			PPOS protocol	-0.39615	0.23377	0.094	-0.8622	0.0699
			mild-stimulation protocol	-0.32429	0.28031	0.251	-0.8831	0.2345
LPS-available embryo (rate)	LSD	short protocol	long protocol	-0.13889	0.20917	0.509	-0.5559	0.2781
			antagonist protocol	-0.1962	0.14504	0.18	-0.4853	0.0929
			PPOS protocol	-0.21197	0.14504	0.148	-0.5011	0.0772
			mild-stimulation protocol	-0.26032	0.18899	0.173	-0.6371	0.1164
			natural-cycle protocol	-0.35489	0.20917	0.094	-0.7719	0.0621
		long protocol	short protocol	0.13889	0.20917	0.509	-0.2781	0.5559
			antagonist protocol	-0.05731	0.18313	0.755	-0.4224	0.3078
			PPOS protocol	-0.07308	0.18313	0.691	-0.4381	0.292
			mild-stimulation protocol	-0.12143	0.21959	0.582	-0.5592	0.3163
			natural-cycle protocol	-0.216	0.23718	0.365	-0.6888	0.2568
		antagonist protocol	short protocol	0.1962	0.14504	0.18	-0.0929	0.4853
			long protocol	0.05731	0.18313	0.755	-0.3078	0.4224
			PPOS protocol	-0.01577	0.10401	0.88	-0.2231	0.1916
			mild-stimulation protocol	-0.06412	0.15969	0.689	-0.3825	0.2542
			natural-cycle protocol	-0.15869	0.18313	0.389	-0.5238	0.2064
		PPOS protocol	short protocol	0.21197	0.14504	0.148	-0.0772	0.5011
			long protocol	0.07308	0.18313	0.691	-0.292	0.4381
			antagonist protocol	0.01577	0.10401	0.88	-0.1916	0.2231
			mild-stimulation protocol	-0.04835	0.15969	0.763	-0.3667	0.27
			natural-cycle protocol	-0.14292	0.18313	0.438	-0.508	0.2221
		mild-stimulation protocol	short protocol	0.26032	0.18899	0.173	-0.1164	0.6371
			long protocol	0.12143	0.21959	0.582	-0.3163	0.5592
			antagonist protocol	0.06412	0.15969	0.689	-0.2542	0.3825
			PPOS protocol	0.04835	0.15969	0.763	-0.27	0.3667
			natural-cycle protocol	-0.09457	0.21959	0.668	-0.5323	0.3432
		natural-cycle protocol	short protocol	0.35489	0.20917	0.094	-0.0621	0.7719
			long protocol	0.216	0.23718	0.365	-0.2568	0.6888
			antagonist protocol	0.15869	0.18313	0.389	-0.2064	0.5238
			PPOS protocol	0.14292	0.18313	0.438	-0.2221	0.508
			mild-stimulation protocol	0.09457	0.21959	0.668	-0.3432	0.5323
FPS-high quality embryo (rate)	Tamhane	short protocol	long protocol	-0.10978	0.23439	1	-1.0336	0.8141
			antagonist protocol	-0.08585	0.16923	1	-0.6846	0.5129
			PPOS protocol	-0.18778	0.17272	0.995	-0.7906	0.4151
			mild-stimulation protocol	-0.30206	0.24064	0.981	-1.176	0.5718
			natural-cycle protocol	0.22222	0.14699	0.938	-0.3812	0.8256
		long protocol	short protocol	0.10978	0.23439	1	-0.8141	1.0336
			antagonist protocol	0.02392	0.20092	1	-0.9307	0.9786
			PPOS protocol	-0.078	0.20386	1	-1.0181	0.8621
			mild-stimulation protocol	-0.19229	0.26389	1	-1.206	0.8214
			natural-cycle protocol	0.332	0.18258	0.901	-0.8025	1.4665
		antagonist protocol	short protocol	0.08585	0.16923	1	-0.5129	0.6846
			long protocol	-0.02392	0.20092	1	-0.9786	0.9307
			PPOS protocol	-0.10192	0.12354	1	-0.4818	0.278
			mild-stimulation protocol	-0.21621	0.20818	0.997	-1.0531	0.6206
			natural-cycle protocol	.30808*	0.08387	0.017	0.0368	0.5794
		PPOS protocol	short protocol	0.18778	0.17272	0.995	-0.4151	0.7906
			long protocol	0.078	0.20386	1	-0.8621	1.0181
			antagonist protocol	0.10192	0.12354	1	-0.278	0.4818
			mild-stimulation protocol	-0.11429	0.21102	1	-0.9479	0.7194
			natural-cycle protocol	.41000*	0.0907	0.002	0.1166	0.7034
		mild-stimulation protocol	short protocol	0.30206	0.24064	0.981	-0.5718	1.176
			long protocol	0.19229	0.26389	1	-0.8214	1.206
			antagonist protocol	0.21621	0.20818	0.997	-0.6206	1.0531
			PPOS protocol	0.11429	0.21102	1	-0.7194	0.9479
			natural-cycle protocol	0.52429	0.19054	0.398	-0.3665	1.415
		natural-cycle protocol	short protocol	-0.22222	0.14699	0.938	-0.8256	0.3812
			long protocol	-0.332	0.18258	0.901	-1.4665	0.8025
			antagonist protocol	-.30808*	0.08387	0.017	-0.5794	-0.0368
			PPOS protocol	-.41000*	0.0907	0.002	-0.7034	-0.1166
			mild-stimulation protocol	-0.52429	0.19054	0.398	-1.415	0.3665
LPS-high quality embryo (rate)	LSD	short protocol	long protocol	-0.13889	0.19868	0.487	-0.5349	0.2572
			antagonist protocol	-0.15658	0.13776	0.259	-0.4312	0.118
			PPOS protocol	-0.0985	0.13776	0.477	-0.3731	0.1761
			mild-stimulation protocol	-0.23175	0.1795	0.201	-0.5896	0.1261
			natural-cycle protocol	-0.15489	0.19868	0.438	-0.5509	0.2412
		long protocol	short protocol	0.13889	0.19868	0.487	-0.2572	0.5349
			antagonist protocol	-0.01769	0.17394	0.919	-0.3644	0.329
			PPOS protocol	0.04038	0.17394	0.817	-0.3064	0.3871
			mild-stimulation protocol	-0.09286	0.20857	0.657	-0.5086	0.3229
			natural-cycle protocol	-0.016	0.22528	0.944	-0.4651	0.4331
		antagonist protocol	short protocol	0.15658	0.13776	0.259	-0.118	0.4312
			long protocol	0.01769	0.17394	0.919	-0.329	0.3644
			PPOS protocol	0.05808	0.09879	0.558	-0.1389	0.255
			mild-stimulation protocol	-0.07516	0.15167	0.622	-0.3775	0.2272
			natural-cycle protocol	0.00169	0.17394	0.992	-0.345	0.3484
		PPOS protocol	short protocol	0.0985	0.13776	0.477	-0.1761	0.3731
			long protocol	-0.04038	0.17394	0.817	-0.3871	0.3064
			antagonist protocol	-0.05808	0.09879	0.558	-0.255	0.1389
			mild-stimulation protocol	-0.13324	0.15167	0.383	-0.4356	0.1691
			natural-cycle protocol	-0.05638	0.17394	0.747	-0.4031	0.2904
		mild-stimulation protocol	short protocol	0.23175	0.1795	0.201	-0.1261	0.5896
			long protocol	0.09286	0.20857	0.657	-0.3229	0.5086
			antagonist protocol	0.07516	0.15167	0.622	-0.2272	0.3775
			PPOS protocol	0.13324	0.15167	0.383	-0.1691	0.4356
			natural-cycle protocol	0.07686	0.20857	0.714	-0.3389	0.4926
		natural-cycle protocol	short protocol	0.15489	0.19868	0.438	-0.2412	0.5509
			long protocol	0.016	0.22528	0.944	-0.4331	0.4651
			antagonist protocol	-0.00169	0.17394	0.992	-0.3484	0.345
			PPOS protocol	0.05638	0.17394	0.747	-0.2904	0.4031
			mild-stimulation protocol	-0.07686	0.20857	0.714	-0.4926	0.3389
* The mean difference is significant at the 0.05 level.
