# Supplementary material for: Retrospective study of influencing factors on the outcomes of luteal phase stimulation in patients with dual stimulation
Source: PeerJ. 2023 May 5;11:e15296. doi: 10.7717/peerj.15296 (PMC10166075; doi:10.7717/peerj.15296)
Supplement: Supplemental Information 2 [file peerj-11-15296-s002.xlsx]

## Sheet: DS raw data
OPU DATE	No.	femal age	male age	Insemination method	ovarian stimulation	GN priming dose	Gn days	total Gn	Gn_E2	Gn_FSH	HCG LH	HCG E2	HCG P	HCG dose	follicular number on HCG	follicular number(<10) on HCG	follicular number(10-14) on HCG	follicular number(14-18) on HCG	follicular number(18-20) on HCG	follicular number(>20) on HCG	follicular number(>18) on HCG	follicular number(>16) on HCG	follicular number(>14) on HCG	OPU	MII	MI	GV	OPN	1PN	2PN	>2PN	Number of fertilized eggs	number of normally fertilized eggs	number of normally cleavage eggs	available embryo	high quality embryo
2016-11-09	026588	38	53	IVF	short protocol	300	11	2400			6.39	295.8	0.75	0.25	1	0	0	0	1	0	1	1	1	1	0	0	0	0	0	0	0	0	0	0	0	0
2016-11-12	026588	38	53	IVF	LPS	150	5	750
2016-11-28	022107	34	30	IVF	mild-stimulation protocol	300	9	2475																1	0	0	0	0	0	0	1	1	0	0	0	0
2016-12-04	022107	34	30	ICSI	LPS	300	5	1275			3.27	487.1		0.25	2	0	0	1	1	0	1	2	2	0	0	0	0	0	0	0	0	0	0	0	0	0
2017-06-17	027459	41	42	IVF	natural-cycle protocol	150	1	150	188.2	31.42	58.4	188.2	1.16	0.25	3	2	0	0	0	0	0	0	1	0	0	0	0	0	0	0	0	0	0	0	0	0
2017-06-25	027459	42	42	IVF	LPS	150	6	900			17.93	396.00	1.28	2000	2	0	0	0	0	0	0	0	2	1	0	0	0	0	0	0	0	1	0	0	1	0
2017-09-14	027621	43	33	IVF	antagonist protocol	225	4	862.5	127.4	5.17	4.51	227.1	0.94	2000	2	0	0	1	1	0	1	2	2	1	0	1	0	0	0	0	0	0	0	0	0	0
2017-09-22	027621	43	33	IVF	LPS	225	6	1350	183.8	6.57	3.49	302.5	11.53	0.25	4	0	0	0	0	1	1	1	4	2	0	0	0	0	0	1	1	2	1	1	1	1
2018-06-01	028713	40	40	ICSI	PPOS protocol																			1	0	0	0	0	0	1	0	1	1	1	1	1
2018-06-04	028713	40	40	ICSI	LPS						5.25	90.99	2.45	2000	2	1	0	0	0	0	0	0	1	0	0	0	0	0	0	0	0	0	0	0	0	0
2018-12-22	029008	36	38	IVF	PPOS protocol	300	5	1350			3.79	333.6	3.28	2000	4	2	1	0	1	0	1	1	1	1	0	0	0	0	0	1	0	1	1	1	1	0
2018-12-26	029008	36	38	IVF	LPS	150	4	600			0.41	372.5	12.61	0.25	3	1	0	1	1	0	1	2	2	0	0	0	0	0	0	0	0	0	0	0	0	0
2018-05-06	028001	39	37	IVF	PPOS protocol	300	13	4650			7.25	386.0	12.86	2000	6	4	0	0	1	0	1	1	2	1	0	0	0	0	0	1	0	1	1	1	1	0
2018-05-11	028001	39	37	IVF	LPS	375	4	1500			2.46	559.2	20.46	2000	1	0	0	0	1	0	1	1	1	1	0	1	0	0	0	0	0	1	0	0	0	0
2018-10-24	028701	33	32	DS,IVF	mild-stimulation protocol	300	5	1275	41.39	8.59	3.41	70.05	0.05	2000	4	3	0	0	1	0	1	1	1	1	1	0	0	0	0	1	0	1	1	1	1	0
2018-11-01	028701	33	32	DS,IVF	LPS	225	7	1425			8.63	52.27	10.47	0.25	5	1	2	1	1	0	1	2	2	3	0	0	0	0	0	3	0	3	3	3	2	1
2018-03-22	028143	34	44	IVF	mild-stimulation protocol	225	5	1050			4.56	112.7	0.09	0.25	1	0	0	1	0	0	0	1	1	1	0	0	0	0	0	1	0	1	1	1	1	1
2018-04-06	028143	34	44	IVF	LPS	150	1	150	105.4	2.77														1	0	0	0	0	0	0	1	1	0	0	0	0
2018-12-13	029273	41	43	IVF	mild-stimulation protocol	225	8	1725			2.89	473	0.34	2000	4	1	1	0	1	0	1	1	2	3	0	0	0	0	0	2	1	3	2	2	2	2
2018-12-18	029273	41	43	IVF	LPS	300	5	1275			2.52	180.8	35.56	2000	5	0	2	0	2	1	3	3	3	0	0	0	0	0	0	0	0	0	0	0	0	0
2018-01-18	026500	44	63	IVF	改良超long protocol	300	13	3600	5	5	0.25	98.15	0.25	0.25	2	0	1	1	0	0	0	1	1	1	0	0	0	0	0	1	0	1	1	1	1	1
2018-01-24	026500	44	63	IVF	LPS	150	5	750			0.1	519.9	13.45	0.25	2	0	0	1	0	0	0	1	2	1	0	0	0	0	0	1	0	1	1	1	1	1
2018-05-26	028449	45	45	IVF	mild-stimulation protocol	150	6	900			3.35	114.10	0.18	2000	5	1	3	0	1	0	1	1	1	1	0	0	0	0	0	0	0	0	0	0	0	0
2018-05-28	028449	45	45	IVF	LPS	150	2	300						2000	0	0	0	0	0	0	0	0	0	1	0	0	0	0	0	0	1	1	0	0	0	0
2018-08-20	029004	39	46	ICSI	PPOS protocol	300	4	1200																1	0	0	0	0	1	0	0	1	0	0	0	0
2018-08-24	029004	39	46	ICSI	LPS	300	3	750			1.9	965.3	6.11	0.25	5	0	2	2	0	0	0	2	3	5	3	0	0	0	0	3	0	3	3	2	2	1
2018-05-04	028573	36	42	IVF	PPOS protocol	300	8	2400			11.44	423	26.13	2000	3	0	2	1	0	0	0	1	1	1	0	0	0	0	0	1	0	1	1	1	1	1
2018-05-12	028573	36	42	IVF	LPS	300	7	2100			1.08	576.2	37.01	2000	4	0	2	0	0	2	2	2	2	2	0	0	0	0	0	1	1	2	1	1	1	0
2018-07-02	028063	46	43	IVF	PPOS protocol	150	22	5025	150.7	4.48	14.2	357	0.4	4000	1	0	0	0	1	0	1	1	1	3	0	0	0	0	0	3	0	3	3	3	2	1
2018-07-05	028063	46	43	IVF	LPS	150	2	300	345	4.43	0.84	544.7	17.34	6000	3	0	0	1	1	1	2	3	3	0	0	0	0	0	0	0	0	0	0	0	0	0
2018-09-02	028508	39	45	ICSI	PPOS protocol	300	5	1200	45.1	7.89														3	3	0	0	0	0	3	0	3	3	3	1	1
2018-09-06	028508	39	45	ICSI	LPS	300	3	900			0.1	337.8	0.1	4000.25	4	0	2	2	0	0	0	2	2	1	0	0	0	0	0	0	0	0	0	0	0	0
2018-10-25	029122	31	32	IVF	antagonist protocol	225	4	825	46.99	6.15	1.24	422.6	0.1	2000	3	1	1	0	1	0	1	1	1	1	1	0	0	0	0	0	0	0	0	0	0	0
2018-11-01	029122	32	32	ICSI	LPS	225	6	1200	131.3	7.7	0.68	116.7	24.82	0.25	3	0	0	0	1	0	1	1	3	1	0	0	0	0	0	1	0	1	1	1	1	1
2018-10-24	028472	31	32	ICSI	antagonist protocol	262.5	6	1612.5	58.89	6.92	1.37	250.4	0.15	2000	4	3	0	0	1	0	1	1	1	0	0	0	0	0	0	0	0	0	0	0	0	0
2018-11-05	028472	31	32	ICSI	LPS	225	10	2287.5			0.46	95.01	0.4	0.25	1	0	0	0	1	0	1	1	1	0	0	0	0	0	0	0	0	0	0	0	0	0
2018-07-14	024823	36	39	IVF	natural-cycle protocol																			0	0	0	0	0	0	0	0	0	0	0	0	0
2018-07-22	024823	36	39	IVF	LPS	225	7	1875			5.88	593.4	12.61	2000	4	0	2	1	0	0	0	1	2	3	0	0	0	0	0	1	0	1	1	1	1	1
2018-08-23	027705	46	42	IVF	PPOS protocol	225	9	1725	26.63	12.15	9.74	285.50	0.29	2000	1	0	0	1	0	0	0	1	1	1	0	0	0	0	0	1	0	1	1	1	1	1
2018-08-29	027705	46	42	IVF	LPS	225	13	3075	5	13.77
2018-07-30	028146	29	31	IVF	long protocol	150	17	4125	5.62	30	0.38	363.80	0.19	0.5	21	13	7	1	0	0	0	1	1	1	0	0	0	0	0	1	0	1	1	1	0	0
2018-08-02	028146	29	31	IVF	LPS	150	1	150						2000	7	0	2	1	1	0	1	2	5	1	0	1	0	0	0	0	0	0	0	0	0	0
2018-11-24	029031	33	33	IVF	natural-cycle protocol	300	3	900	300.90	1.44														1	0	0	0	0	0	0	1	1	0	0	0	0
2018-12-05	029031	33	33	ICSI	LPS	300	10	3225	300.90	6.40														6	4	2	0	0	0	4	0	4	4	4	4	4
2018-07-14	028874	42	42	IVF	PPOS protocol	150	4	600	56.4	7.73	21.33	238.6	0.12	2000	1	0	0	1	0	0	0	1	1	0	0	0	0	0	0	0	0	0	0	0	0	0
2018-07-22	028874	42	42	IVF	LPS	150	7	1275			0.47	312.1	1.37	2000	4	0	2	1	0	0	0	1	2	1	0	0	0	0	0	0	0	0	0	0	0	0
2018-04-20	028496	30	33	IVF	natural-cycle protocol	225	3	675	65.48	3.80														1	0	1	0	0	0	0	0	0	0	0	0	0
2018-04-27	028496	30	33	IVF	LPS	225	6	1350			0.75	1016	5.11	2000	3	0	0	2	1	0	1	3	3	2	0	0	0	0	0	2	0	2	2	2	2	1
2019-02-18	029093	37	38	ICSI,PGD	PPOS protocol	150	6	900	37.84	11.87	6.40	342.4	0.08	2000	3	1	1	1	0	0	0	1	1	1	1	0	0	0	0	1	0	1	1	1	0	0
2019-02-21	029093	37	38	ICSI,PGD	LPS	225	3	675																0	0	0	0	0	0	0	0	0	0	0	0	0
2019-12-01	030437	32	32	ICSI,PGD	antagonist protocol	187.5	7	1387.5	37.03	6.64	23.98	1566	0.71	2000	8	0	0	3	2	1	3	6	8	10	9	0	1	0	0	7	0	7	7	7	1	1
2019-12-06	030437	32	32	ICSI,PGD	LPS	225	2	375	629.4	7.27	1.88	317.4	23.37	0.25	4	0	0	0	3	0	3	3	4	1	1	0	0	0	0	0	0	0	0	0	0	0
2019-10-16	028254	44	43	IVF	PPOS protocol	300	9	2475	11.04	8.59														3	0	0	0	0	0	3	0	3	3	3	3	3
2019-10-21	028254	44	43	IVF	LPS	300	4	1150			1.31	1166	2.09	2000.25	4	0	0	3	0	0	0	3	4	4	0	1	0	0	0	1	0	1	1	1	1	1
2019-01-13	029014	26	29	IVF	antagonist protocol	150	11	1950	47.56	5.84	5.65	745.90	0.13	0.25	10	4	4	1	1	0	1	2	2	1	1	0	0	0	1	0	0	1	0	0	1	0
2019-01-15	029014	27	29	IVF	LPS	150	2	300						6000	6	0	1	3	1	0	1	4	5	0	0	0	0	0	0	0	0	0	0	0	0	0
2019-12-01	030291	31	30	IVF	mild-stimulation protocol	150	3	450																1	0	0	0	0	0	1	0	1	1	1	1	1
2019-12-10	030291	31	30	IVF	LPS	225	8	1800			3.87	1329	5.35	0.25	5	0	1	1	1	0	1	2	4	5	0	0	0	0	0	5	0	5	5	5	3	2
2019-07-11	029906	34	38	IVF	short protocol	300	9	2175																1	0	0	0	0	0	1	0	1	1	1	1	0
2019-07-13	029906	34	38	IVF	LPS	225	2	450																1	0	1	0	0	0	0	0	0	0	0	0	0
2019-12-10	030242	40	38	IVF	PPOS protocol	300	7	1950	75.8	9.16														2	0	0	0	0	0	2	0	2	2	2	1	1
2019-12-15	030242	40	38	IVF	LPS	300	4	1200			0.10	937.60	29.15	2000	5	2	2	0	0	0	0	0	1	2	0	1	0	0	0	1	0	1	1	1	1	1
2019-08-08	030115	45	46	IVF	short protocol	300	14	3900			5.53	960.8	0.26	0.25	2	0	1	0	0	0	0	0	1	1	0	0	0	0	0	1	0	1	1	1	1	0
2019-08-10	030115	45	46	IVF	LPS																			1	0	0	0	0	1	0	0	1	0	0	0	0
2019-09-13	030240	23	26	IVF	antagonist protocol	200	6	1162.5	29.64	5.73	4.33	1107	0.26	2000	8	1	4	0	1	0	1	1	3	1	0	0	0	0	0	1	0	1	1	1	1	1
2019-09-21	030240	23	26	IVF	LPS	225	7	1650	1144	10.72	0.92	529.6	12.72	0.25	15	0	0	9	2	2	4	13	15	4	0	0	0	0	0	2	0	2	2	2	1	1
2019-04-01	029122	32	32	ICSI	mild-stimulation protocol	75	1	75	267	9.05	4.11	320.1	0.15	2000	6	5	0	1	0	0	0	1	1	0	0	0	0	0	0	0	0	0	0	0	0	0
2019-04-09	029122	32	32	ICSI	LPS	225	6	1275			4.05	323.3	12.79	0.25	9	5	1	0	1	0	1	1	3	3	1	1	1	0	0	2	0	2	2	1	1	1
2019-06-17	027910	28	30	IVF	超long protocol	225	11	2325	7.59	3.46	0.67	>3000	1.65	0.25	7	0	2	0	1	1	2	2	5	3	0	1	0	0	0	2	0	2	2	2	2	1
2019-06-18	027910	28	30	IVF	LPS	150	1	150																16	0	2	0	0	3	9	1	13	9	9	4	4
2019-08-26	030219	40	39	IVF	antagonist protocol	225	5	975	35.47	7	1.61	317.1	0.14	2000	3	0	2	0	1	0	1	1	1	2	0	0	0	0	0	1	1	2	1	1	0	0
2019-09-08	030219	40	39	IVF	LPS	225	12	2362.5	168.8	12.46	1.28	116.8	0.66	0.25	9	0	1	3	1	1	2	5	8	8	0	0	0	0	0	6	2	8	6	6	6	5
2019-09-28	030306	37	41	ICSI	antagonist protocol	150	2	187.5	162	4.25	5.91	185.8	0.16	2000	3	1	0	1	0	0	0	1	2	1	0	0	0	0	0	0	0	0	0	0	0	0
2019-10-07	030306	37	41	ICSI	LPS	225	4	825			5.47	64.33	9.26	0.25	2	0	1	1	0	0	0	1	1	1	1	0	0	0	0	1	0	1	1	1	1	1
2019-11-12	030220	37	40	ICSI	antagonist protocol	250	5	1200	139.40	6.00														1	1	0	0	0	0	1	0	1	1	0	0	0
2019-11-15	030220	37	40	ICSI	LPS	225	2	450																5	2	1	1	0	0	2	0	2	2	2	2	1
2019-12-17	030186	43	49	IVM,ICSI	PPOS protocol	225	6	1050	25.54	9.76	5.02	207.6	0.09	2000	3	2	0	1	0	0	0	1	1	1	0	0	0	0	0	1	0	1	1	1	1	1
2019-12-26	030186	43	49	ICSI	LPS	225	7	1425	105.4	14.87	2.15	71.2	6.06	0.25	1	0	0	0	1	0	1	1	1	1	1	0	0	0	0	1	0	1	1	1	0	0
2019-09-20	029988	30	32	ICSI	natural-cycle protocol						2.76	88.93	0.23	2000	2	1	0	0	1	0	1	1	1	1	1	0	0	0	0	0	0	0	0	0	0	0
2019-10-02	029988	30	32	ICSI	LPS	225	10	2250	72.59	3.84	4.48	116.1	9.61	0.25	5	0	1	1	1	2	3	4	4	2	2	0	0	0	1	1	0	2	1	1	0	0
2019-10-02	030310	29	29	IVF	mild-stimulation protocol	150	3	450	74.63	10.82	9.08	330.5	0.3	2000	4	0	1	2	1	0	1	3	3	3	3	0	0	0	0	3	0	3	3	3	3	3
2019-10-16	030310	29	29	IVF	LPS	225	12	2662.5	47.03	14.67	3.01	74.66	5.77	0.25	10	5	2	0	1	0	1	1	3	3	0	0	0	0	0	3	0	3	3	3	3	3
2020-12-09	026839	40	39	ICSI	antagonist protocol	262.5	10	2587.5	32.61	6.94				0.2	3	0	1	0	1	0	1	1	2	1	1	0	0	0	0	0	0	0	0	0	0	0
2020-12-27	026839	40	39	ICSI	LPS	225	14	3750			1.38	327.2	0.09	0.25	2	0	0	1	0	0	0	1	2	2	1	1	0	0	0	1	0	1	1	1	1	1
2020-10-13	030007	31	31	ICSI	PPOS protocol	225	7	1575						2000	4	0	2	0	0	1	1	1	2	1	1	0	0	0	0	1	0	1	1	1	0	0
2020-10-22	030007	31	31	ICSI	LPS	225	7	1687.5			1.53	570.7	7.06	0.25	6	0	5	0	1	0	1	1	1	4	4	0	0	0	0	4	0	4	4	4	2	1
2020-09-10	030274	40	40	IVF	antagonist protocol	225	6	1275	31.64	7.9	2.38	349.1	0.11	2000	3	1	0	1	1	0	1	2	2	1	0	0	0	0	0	1	0	1	1	1	1	1
2020-09-25	030274	40	40	IVF	LPS	225	13	3300	126.9	8.88	1.36	243	0.78	0.25	2	0	0	0	2	0	2	2	2	3	0	0	0	0	0	3	0	3	3	3	1	1
2020-10-25	030957	31	30	ICSI	antagonist protocol	300	8	2250	169.7	12.31				2000	4	2	0	1	1	0	1	2	2	2	2	0	0	0	0	2	0	2	2	2	2	1
2020-11-01	030957	31	30	ICSI	LPS	300	6	1725			1.38	1059	9.78	0.25	5	0	1	3	0	0	0	3	4	3	3	0	0	0	0	2	0	2	2	2	2	2
2020-03-19	030381	40	40	IVF	PPOS protocol	225	6	1162.5	44.82	9.71	4.85	328.8	0.21	2000	1	0	0	1	0	0	0	1	1	1	0	0	0	0	0	1	0	1	1	1	1	1
2020-03-25	030381	40	40	IVF	LPS	150	4	600	132.9	20.3	2.56	45.65	6.86	0.25	2	0	0	0	0	2	2	2	2	1	0	0	0	0	0	1	0	1	1	1	1	1
2020-12-02	030396	35	33	IVF	antagonist protocol	262.5	6	1312.5	24.73	6.7	0.7	188.6	0.05	2000	8	4	3	1	0	0	0	1	1	3	2	1	0	0	0	2	0	2	2	2	1	1
2020-12-16	030396	35	33	IVF	LPS	225	13	3600	172.3	9.6	1.51	219.9	0.35	2000.25	8	0	0	2	4	0	4	6	8	9	0	1	0	0	1	7	0	8	7	7	6	4
2020-12-23	030306	39	43	ICSI	antagonist protocol	225	11	2537.5	34.22	8.21	2.55	725.5	0.23	2000	7	3	0	1	1	0	1	2	4	3	2	1	0	0	0	2	0	2	2	2	2	2
2020-12-28	030306	39	43	ICSI	LPS						2.25	27.42	26.44	0.25	3	0	1	0	1	0	1	1	2	0
2020-06-12	030692	40	40	IVF	antagonist protocol	300	6	1387.5	57.95	6.75	2.23	411.3	0.17	2000	5	4	0	1	0	0	0	1	1	1	0	0	0	0	0	1	0	1	1	1	1	0
2020-06-17	030692	41	41	IVF	LPS						1.06	180.3	10.22	0.25	3	0	1	1	1	0	1	2	2	0
2020-04-16	029898	34	35	ICSI	PPOS protocol	300	5	1500	115.50	18.31														2	2	0	0	0	0	2	0	2	2	2	2	1
2020-04-26	029898	34	35	ICSI	LPS	300	9	3075			0.72	763.8	12.19	2000	5	0	2	1	0	0	0	1	3	4	1	1	0	0	0	1	0	1	1	1	1	1
2020-05-10	030202	34	34	IVF	antagonist protocol	300	7	1875	37.42	7.53	5.37	475	0.32	0.25	2	0	0	1	1	0	1	2	2	1	0	0	0	0	0	0	1	1	0	0	0	0
2020-05-20	030202	34	34	ICSI	LPS	300	8	2325			1.32	>3000	13.53	0.25	6	0	0	2	3	1	4	6	6	8	8	0	0	0	1	7	0	8	7	7	1	1
2020-11-20	031178	43	38	ICSI	PPOS protocol	300	16	5400	91.01	3.61				4000	3	1	1	0	1	0	1	1	1	1	1	0	0	0	0	1	0	1	1	1	1	1
2020-11-27	031178	43	38	IVF	LPS	375	6	2250																1	0	0	0	0	0	1	0	1	1	1	1	1
2020-01-13	030531	40	35	IVF	antagonist protocol	150	5	750						0.25	3	1	1	0	1	0	1	1	1	2	0	0	0	0	0	0	1	1	0	0	0	0
2020-01-17	030531	40	35	IVF	LPS																			0	0	0	0	0	0	0	0	0	0	0	0	0
2020-10-24	030525	34	31	ICSI	PPOS protocol	300	3	825	159.6	4.2	10.6	450.6	0.37	2000	4	2	1	0	1	0	1	1	1	1	1	0	0	0	0	1	0	1	1	1	0	0
2020-11-01	030525	34	31	ICSI	LPS	300	7	2325			1.21	445.9	11.66	0.25	2	0	0	2	0	0	0	2	2	2	2	0	0	0	0	2	0	2	2	2	2	2
2020-11-25	029367	46	44	IVF	PPOS protocol	225	10	2550	85.78	3.63	5.31	1923	0.12	6000	9	1	6	1	1	0	1	2	2	2	0	1	0	0	0	0	1	1	0	0	0	0
2020-11-28	029367	46	44	ICSI	LPS	225	2	450						0.25	6	0	3	0	1	0	1	1	3	3	2	0	1	0	0	1	1	2	1	1	1	0
2021-01-31	030259	40	42	IVF	short protocol	262.5	9	2437.5	69.64	7.74	13.95	1103.0	0.45	2000	6	3	1	0	1	0	1	1	2	1	0	0	0	0	0	0	1	1	0	0	0	0
2021-02-04	030259	40	42	ICSI	LPS	262.5	2	487.5			0.97	700.4	9.01	0.25	3	0	1	2	0	0	0	2	2	0
2021-03-14	029919	33	35	IVF	antagonist protocol	225	15	3825	18.85	5.27														2	0	0	0	0	0	2	0	2	2	2	2	2
2021-03-18	029919	34	35	IVF	LPS	300	2	600	142.90	5.85	1.20	396.50	6.89	0.25	8	0	4	4	0	0	0	4	4	0
2021-09-25	031569	40	43	ICSI	PPOS protocol	225	7	1800	44.78	11.59	5.25	897.80	0.30	2000	7	6	0	0	1	0	1	1	1	1	1	0	0	0	0	1	0	1	1	1	0	0
2021-09-30	031569	40	43	ICSI	LPS	225	4	1125			2.14	2158.00	10.67	0.25	7	0	3	0	1	0	1	1	4	3	2	1	0	0	0	1	0	1	1	1	1	1
2021-10-13	031818	42	40	ICSI	antagonist protocol	150	3	450	160.40	6.39	11.02	301.70	0.18	2000	2	0	1	0	1	0	1	1	1	1
2021-10-21	031818	42	41	ICSI	LPS	150	6	1125			6.67	193.90	17.93	2000	2	1	0	0	0	0	0	0	1	0
2021-10-01	031828	25	28	IVF	antagonist protocol	187.5	8	1537.5			2.95	1551.00	0.08	0.25	8	1	3	0	0	1	1	1	4	3	0	1	0	0	0	2	0	2	2	2	2	2
2021-10-02	031828	25	28	IVF	LPS									2000	6	0	1	3	1	0	1	4	5	6	0	2	0	0	0	3	0	3	3	2	2	2
2021-03-20	031357	42	44	IVF	PPOS protocol	300	9	3375						4000	4	2	0	1	1	0	1	2	2	1	0	0	0	0	0	1	0	1	1	1	1	1
2021-03-26	031357	42	44	IVF	LPS	375	5	1650			0.10	370.10	15.64	2000	2	0	0	0	1	0	1	1	2	0
2021-05-21	031106	32	35	IVF	antagonist protocol	225	9	2025	31.94	8.21	19.80	2230.00	1.78	0.25	8	0	3	2	1	0	1	3	5	4	0	0	0	0	0	2	2	4	2	2	0	0
2021-05-22	031106	32	35	IVF	LPS	150	1	150																6	0	0	0	0	1	4	1	6	4	4	1	1
2021-05-30	031103	31	30	ICSI	PPOS protocol	300	9	2625	31.89	6.73	15.49	>3000.00	1.28	0.25	15	0	0	7	3	0	3	10	15	10	7	1	2	0	0	6	0	6	6	6	5	4
2021-06-01	031103	31	30	ICSI	LPS																			1	1	0	0	0	0	0	0	0	0	0	0	0
2021-03-12	031198	36	32	ICSI	natural-cycle protocol						1.44	182.50	0.21	2000	1	1	0	0	0	0	0	0	0	1	0	0	1	0	0	0	0	0	0	0	0	0
2021-03-25	031198	36	32	ICSI	LPS	300	12	3787.5	55.75	2.06	1.68	179.00	0.23	0.25	6	0	0	2	4	0	4	6	6	4	0	0	4	0	0	0	0	0	0	0	0	0
2021-04-08	031443	42	35	IVF	PPOS protocol	300	11	3150			5.00	363.90	3.44	2000	2	1	0	0	1	0	1	1	1	1	0	0	0	0	0	1	0	1	1	1	1	1
2021-04-22	031443	42	35	IVF	LPS	300	13	4200			0.65	532.60	1.12	2000	3	1	0	2	0	0	0	2	2	3	0	0	0	0	0	2	1	3	2	2	2	2
2021-08-02	031457	37	37	IVF	PPOS protocol	300	8	2325	12.11	9.36	2.90	154.30	0.15	2000	5	4	0	1	0	0	0	1	1	1	0	0	0	0	0	1	0	1	1	1	1	1
2021-08-11	031457	37	37	IVF	LPS	225	7	1500	41.71	10.32	1.47	224.40	17.05	0.25	3	2	0	0	1	0	1	1	1	1	0	0	0	0	0	1	0	1	1	1	1	0
2021-10-01	031457	38	37	IVF	antagonist protocol	225	8	1800	33.58	12.46														1	0	0	0	0	0	1	0	1	1	1	1	0
2021-10-17	031457	38	37	IVF	LPS	225	13	3375	47.15	10.88	2.32	111.30	0.55	0.25	3	0	1	1	1	0	1	2	2	2	0	0	0	0	0	2	0	2	2	2	2	2
2021-08-30	031677	29	31	IVF	antagonist protocol	150	6	900			5.82	258.90	0.05	2000	1	0	0	1	0	0	0	1	1	0
2021-09-02	031677	29	31	IVF	LPS						6.50	240.50	3.51	2000	2	1	0	0	1	0	1	1	1	1	0	0	0	0	0	1	0	1	1	1	1	1
2021-12-12	031966	44	42	IVF	short protocol	300	13	4200	5.00	15.58	2.24	145.90	0.05	0.25	2	0	1	0	0	0	0	0	1	0
2021-12-20	031966	44	42	ICSI	LPS	225	6	1800	112.00	7.01	3.90	571.20	0.05	2000	3	0	1	0	1	0	1	1	2	1	1	0	0	0	0	1	0	1	1	1	1	1
2021-01-31	029122	35	35	ICSI	short protocol	225	7	1462.5	25.31	7.25	1.5	413.2	0.12	2000	5	4	0	1	0	0	0	1	1	1	1	0	0	0	0	1	0	1	1	1	1	1
2021-02-04	029122	35	35	ICSI	LPS	225	1	225	136.4	5.84	1.03	202.40	8.19	0.25	5	0	0	2	3	0	3	5	5	0
2021-11-13	031762	41	49	ICSI	long protocol	275	10	2750	5.00	6.53	0.80	719.90	0.05	0.25	6	0	1	1	0	1	1	2	5	3	2	1	0	0	0	1	0	1	1	1	1	1
2021-11-14	031762	41	49	ICSI	LPS	150	1	150																2	0	0	0	0	0	0	0	0	0	0	0	0
2021-03-07	0211029	34	33	IVF	long protocol	200	16	3775			0.49	624.9	0.07	0.25	7	0	2	2	0	1	1	3	5	2	0	0	0	0	0	0	1	1	0	0	0	0
2021-03-09	0211029	34	33	ICSI	LPS						0.56	297.7	17.52	0.25	6	0	2	2	1	0	1	3	4	0
2021-03-27	030633	39	36	IVF	mild-stimulation protocol	150	6	900			6.4	104	0.12	2000	3	0	1	1	0	0	0	1	2	3	0	1	0	0	0	1	0	1	1	1	0	0
2021-04-12	030633	39	36	IVF	LPS	150	2	300																1	0	0	0	0	0	0	1	1	0	0	0	0
2021-08-11	031760	42	41	IVF	antagonist protocol	300	4	1125	78.06	30.67	26.20	207.20	3.72	2000	1	0	0	0	0	0	0	0	1	0
2021-08-14	031760	42	41	IVF	LPS	225	2	450						0.25	2	0	1	0	1	0	1	1	1	0
2021-10-09	031488	33	32	IVF	natural-cycle protocol						3.16	179.00	0.18	2000	3	0	0	1	1	0	1	2	3	0
2021-10-22	031488	33	32	IVF	LPS	225	12	3225	71.19	1.16	1.03	131.20	0.26	0.25	3	0	1	2	0	0	0	2	2	1	0	0	0	0	0	1	0	1	1	1	1	0
2021-11-17	031488	33	32	IVF	short protocol	300	8	2250			8.58	876.3	0.37	0.25	6	2	2	0	1	0	1	1	2	2	0	0	0	0	0	2	0	2	2	2	2	0
2021-11-19	031488	33	32	IVF	LPS	150	2	300	724.40	11.10				2000	5	0	0	0	1	0	1	1	5	1	0	0	0	0	0	1	0	1	1	1	0	0
2021-08-12	031713	44	50	ICSI、PGT	PPOS protocol						19.57	356.60	0.14	2000	3	2	0	1	0	0	0	1	1	1	1	0	0	0	0	1	0	1	1	1	1	1
2021-08-19	031713	44	50	ICSI	LPS	300	5	1425			6.74	30.83	23.47	0.25	2	1	0	0	1	0	1	1	1	0
2021-06-03	031503	37	34	ICSI	long protocol	200	12	2350			0.63	957.1	0.22	0.25	11	0	1	1	3	0	3	4	10	0
2021-06-04	031503	37	34	ICSI	LPS	150	1	150						2000	0	0	0	0	0	0	0	0	0	1	1	0	0	0	0	1	0	1	1	1	0	0
2021-08-18	031503	37	34	ICSI	short protocol	300	11	3900						0.25	4	1	1	1	1	0	1	2	2	1	1	0	0	0	0	1	0	1	1	1	1	1
2021-08-19	031503	37	34	ICSI	LPS																			0
2021-08-20	031770	33	31	IVF	short protocol	300	7	1950	37.86	8.51	12.93	1239.00	0.39	0.25	8	4	1	2	1	0	1	3	3	1	0	0	0	0	0	1	0	1	1	1	1	1
2021-08-23	031770	33	31	IVF	LPS	150	2	300			1.06	769.80	23.13	0.25	4	0	0	0	0	1	1	1	4	0
2021-12-22	021635	40	42	IVF	PPOS protocol	225	11	2700			2.41	403.60	0.07	2000	2	0	0	1	0	0	0	1	2	1	0	1	0	0	0	0	0	0	0	0	0	0
2021-12-24	021635	40	42	IVF	LPS	300	2	825			2.43	359.70	0.74	2000	1	0	0	1	0	0	0	1	1	0
2021-12-26	031252	36	36	IVF	PPOS protocol	262.5	9	2175	5.00	14.89	18.43	219.20	0.05	0.25	2	1	0	1	0	0	0	1	1	1	0	0	0	0	1	0	0	1	0	0	1	0
2021-12-30	031252	36	36	IVF	LPS	225	3	675			29.55	132.80	9.02	0.25	3	1	1	1	0	0	0	1	1	0
2021-01-20	031292	34	36	IVF	antagonist protocol	225	8	1912.5	52.93	5.03	5.53	1728	1.07	0.25	10	0	3	2	3	1	4	6	7	4	0	0	0	0	0	1	3	4	1	1	1	0
2021-01-22	031292	34	36	ICSI	LPS	150	2	300			0.32	831.7	26.38	6000	5	0	1	1	0	1	1	2	4	0
2021-08-06	031748	47	43	IVF	PPOS protocol	300	4	1200			12.45	527.40	0.15	2000	4	2	0	0	1	0	1	1	2	2	2	0	0	0	0	1	1	2	1	1	0	0
2021-08-17	031748	47	43	ICSI	LPS	300	9	2700	256.20	10.43	1.89	257.80	6.91	2000.25	3	0	0	0	2	0	2	2	3	3	3	0	0	0	0	2	0	2	2	2	2	0
2021-11-16	030068	38	36	IVF	antagonist protocol	225	11	2662.5	23.77	6.66	2.59	597.20	0.05	0.25	5	0	3	1	1	0	1	2	2	1	0	0	0	0	0	1	0	1	1	1	1	1
2021-11-18	030068	38	36	IVF	LPS	225	2	450																0
2021-10-11	031809	40	43	IVF	PPOS protocol	225	8	1800	21.20	7.39	5.47	934.60	0.20	2000	5	2	2	1	0	0	0	1	1	1	0	0	0	0	0	1	0	1	1	1	1	0
2021-10-13	031809	40	43	IVF	LPS	187.5	3	562.5																0
2021-07-30	031212	42	33	IVF	mild-stimulation protocol	150	4	600	35.50	22.21	10.23	185.40	0.16	2000.2	2	1	0	0	1	0	1	1	1	1	0	0	0	0	0	1	0	1	1	1	1	1
2021-08-08	031212	42	33	IVF	LPS	225	8	1650	75.87	16.30	3.67	151.30	9.22	0.25	4	1	1	1	1	0	1	2	2	3	0	0	0	0	0	2	0	2	2	2	2	2
2021-06-23	030454	46	45	ICSI	antagonist protocol	225	11	2475	35.31	3.74	2.99	649.50	0.23	0.25	2	0	0	1	0	0	0	1	2	2	1	1	0	0	0	1	0	1	1	1	1	1
2021-06-25	030454	46	45	ICSI	LPS																			0
2021-12-19	030454	47	46	ICSI	antagonist protocol	150	8	1200	25.95	8.35	1.66	476.70	0.12	2000	3	0	2	0	1	0	1	1	1	0
2021-12-20	030454	47	46	ICSI	LPS																			1	1	0	0	0	0	1	0	1	1	1	0	0
2021-11-15	031796	34	35	IVF	antagonist protocol	300	6	1350	30.22	8.26	4.09	636.30	0.14	4000	4	0	2	1	0	1	1	2	2	3	3	0	0	0	0	3	0	3	3	3	1	1
2021-11-29	031796	34	35	IVF	LPS	300	12	4650	300.30	8.85	3.97	181.80	1.03	2000.25	9	1	1	4	1	0	1	5	7	7	0	0	0	0	0	7	0	7	7	7	2	1
2022-2-23	031663	45	46	ICSI	antagonist protocol	300	6	1725			4.98	1459	0.27	2000	10	6	2	0	1	0	1	1	2	1	1	0	0	0	0	1	0	1	1	1	1	1
2022-2-26	031663	45	46	ICSI	LPS	150	2	375	464.2	9.48	4.55	151	6.5	4000	8	4	2	0	1	0	1	1	2	0
2022-1-24	032047	32	34	ICSI	antagonist protocol	200	6	1163	24.21	6	3.94	750.8	0.05	2000	9	1	3	1	1	1	2	3	5	4	4	0	0	0	0	4	0	4	4	4	4	3
2022-1-25	032047	32	34	ICSI	LPS	150	1	150																3	1	1	1	0	0	1	0	1	1	1	1	0
2022-02-04	032071	50	52	IVF	PPOS protocol	225	7	1500	121.5	18.84	26.21	1020	0.41	2000	3	0	2	0	1	0	1	1	1	1	0	0	0	0	0	0	1	1	0	0	0	0
2022-02-16	032071	50	52	ICSI	LPS						4.95	455.1	20.81	2000.1	2	0	0	0	1	0	1	1	2	0
2022-1-18	031598	38	40	ICSI,PGD	short protocol	300	11	3150	26.77	9.96	9.68	1075	0.38	0.25	6	1	4	0	1	0	1	1	1	2	1	0	0	0	0	1	0	1	1	1	0	0
2022-1-20	031598	38	40	ICSI,PGT	LPS	150	1	150																3	2	0	1	0	0	1	0	1	1	1	0	0
2022-02-05	032012	44	44	IVF	natural-cycle protocol						4.85	185.4	0.29		5	4	0	0	0	0	0	0	1	1	0	0	0	0	0	1	0	1	1	1	1	0
2022-02-14	032012	44	44	IVF	LPS	300	7	2100			3.25	896.6	3.53	0.25	4	0	1	0	0	2	2	2	3	3	0	0	0	0	0	3	0	3	3	3	3	3
2022-2-16	031803	30	33	ICSI	antagonist protocol	150	7	1575	22.16	6.63	4.94	1651	0.4	0.25	10	0	6	0	3	0	3	3	4	6	4	1	1	0	1	4	0	4	3	3	2	0
2022-2-17	031803	30	33	ICSI	LPS																			5	3	0	0	0	0	1	0	1	1	1	0	0
2022-1-2	032005	28	32	IVF	long protocol	225	11	1950	5	0.83	1.58	3020	0.33	0.25	13	0	5	3	1	0	1	4	8	10	0	0	0	0	0	10	2	10	8	8	5	2
2022-1-3	032005	28	32	IVF	LPS																			11	0	0	0	0	0	10	3	10	5	5	3	1
2022-1-2	031762	41	49	ICSI	short protocol	300	5	1350	30.23	6.18	6.91	603	0.05	0.25	3	1	1	0	1	0	1	1	1	1	1	0	0	0	0	0	0	0	0	0	0	0
2022-1-4	031762	41	49	ICSI	LPS	225	1	225	731.4	4.86	1.69	731.4	5.69	2000	4	0	1	0	0	0	0	0	3	1	0	0	0	0	0	0	0	0	0	0	0	0
2022-1-12	032033	37	43	IVF	short protocol	225	8	2325			6.84	2639	0.41	0.25	10	0	5	1	2	0	2	3	5	6	5	1	0	0	0	5	0	5	5	4	1	0
2022-1-13	032033	37	43	ICSI	LPS																			3	2	1	0	0	0	1	0	1	1	1	0	0
2022-01-24	032015	40	43	IVF	antagonist protocol	150	25	7050			17.73	127.8	0.08	0.25	1	0	0	1	0	0	0	1	1	1	0	0	0	0	0	1	0	1	1	1	1	1
2022-02-11	032015	40	43	IVF	LPS	225	11	2850			19.52	291.2	0.3	0.25	2	0	0	2	0	0	0	2	2	0
2022-2-19	031252	36	36	IVF	antagonist protocol	225	6	1325	34.35	12.66	9.4	320.6	0.22	2000	1	0	0	1	0	0	0	1	1	1	0	0	0	0	0	0	0	0	0	0	0	0
2022-2-27	031252	36	36	IVF	LPS	225	5	1200			11.15	358.5	27.99	2000	2	0	1	0	0	0	0	0	1	0
2022-03-20	032020	33	33	IVF	short protocol	300	7	1950			7.87	542	0.21	0.25	3	0	2	0	1	0	1	1	1	1	0	0	0	0	0	0	1	1	0	0	0	0
2022-03-22	032020	33	33	ICSI	LPS																			1	1	0	0	0	0	0	0	0	0	0	0	0
2022-1-20	032043	51	53	ICSI	short protocol	225	6	1350			6.56	557.5	0.05	0.25	3	0	2	1	0	0	0	1	1	1	1	0	0	0	0	1	0	1	1	1	1	1
2022-1-26	032043	51	53	ICSI	LPS	150	4	650						2000	5	0	3	0	0	0	0	0	2
